# Supplementary material for: Comparative Molecular and Metabolic Profiling of Two Contrasting Wheat Cultivars under Drought Stress
Source: Int J Mol Sci. 2021 Dec 10;22(24):13287. doi: 10.3390/ijms222413287 (PMC8707805; doi:10.3390/ijms222413287)
Supplement: Supplementary file 1 [file ijms-22-13287-s001.zip]

Archive with 4 entries (4 files):
- Figure  S1.pdf
- Table S1.xlsx
- Table S2.pdf
- Table S3.xlsx
