# Supplementary material for: Comparative Molecular and Metabolic Profiling of Two Contrasting Wheat Cultivars under Drought Stress
Source: Int J Mol Sci. 2021 Dec 10;22(24):13287. doi: 10.3390/ijms222413287 (PMC8707805; doi:10.3390/ijms222413287)
Supplement: Supplementary file 1 [file ijms-22-13287-s001.zip › Table S1.xlsx]

## Sheet: GC_MS results
Metabolite	Category	Condor Control					Condor Stress					Wadielniel Control					Wadielniel Stress					Average Condor control	average Wadielniel control	Fold change Condor stress vs control					Fold change Wadielniel Stress vs control					Average FC Condor	Standard desviation FC condor	t-test fold change condor	Average FC wadielniel	Standard desviation FC wadielniel	t-test fold change wadielniel
	subtype	CC1	CC2	CC3	CC4	CC5	CS21	CS22	CS23	CS24	CS25	WC1	WC2	WC3	WC4	WC5	WS21	WS22	WS23	WS24	WS25
Adenine	AA	807.54	225.01	970.44	190.56	1032.33	235.7	95.77	138.38	105.08	94.9	401.97	675.05	1062.17	240.32	345.88	167.18	68.47	44.98	320.75	241.47	645.176	545.078	0.365327	0.14844	0.214484	0.16287	0.147092	0.306708	0.125615	0.0825203	0.588448	0.443001	0.207643	0.0825675	0.0241641	0.309258	0.19025	0.0429908
Adenosine-5-monophosphate	Others	50.61	38.68	10.55	18.18	10.41	30.01	32.46	36.17	51.57	18.12	23.72	16.3	38.33	13.75	25.53	45.16	22.24	56.31	17.83	16.51	25.686	23.526	1.16834	1.26372	1.40816	2.00771	0.705443	1.91958	0.945337	2.39352	0.757885	0.701777	1.31068	0.420507	0.435737	1.34362	0.68523	0.40219
Alanine	AA	13548.3	16126.2	22329.2	11659.9	17865.7	18384.8	13794.7	12777.4	15717	13225.7	13613.2	12014.1	21306.1	18564.2	21738.2	17266.9	9632.85	9844.16	14062.9	11589.3	16305.9	17447.2	1.1275	0.845995	0.783608	0.963887	0.811099	0.989667	0.552116	0.564227	0.806027	0.664252	0.906417	0.126489	0.490542	0.715258	0.164661	0.0771143
b-alanine	AA	21.64	10.9	16.45	27.11	22.96	71.72	42.28	46.66	46.61	46.71	25.87	37.69	34.7	27.93	35.53	28.99	39.85	51.58	46.8	20.35	19.812	32.344	3.62003	2.13406	2.35514	2.35261	2.35766	0.896302	1.23207	1.59473	1.44695	0.629174	2.5639	0.534963	0.000855282	1.15984	0.354355	0.426717
Arginine	AA	21.64	19.52	14.82	12.57	21.69	38.26	27.94	23.52	26.66	18.14	19.03	14.44	32.66	19.44	29.76	13.35	14.23	25.07	30.2	9.97	18.048	23.066	2.1199	1.54809	1.30319	1.47717	1.0051	0.578774	0.616925	1.08688	1.30929	0.432238	1.49069	0.366154	0.0476112	0.804821	0.334444	0.410769
Ascorbic acid	OA	149.88	28.03	39.41	19.11	25.49	84.06	85.87	167.05	374.37	154.01	37.57	23.34	52.64	22.34	40.65	81.31	27.47	1004.28	40.46	19.88	52.384	35.308	1.60469	1.63924	3.18895	7.14665	2.94002	2.30288	0.778011	28.4434	1.14592	0.563045	3.30391	2.02834	0.0731854	6.64665	10.9149	0.331283
Asparagine	AA	201.56	195.69	435.29	86.38	176.38	671.01	334.44	565.43	543.27	263.95	190.9	89.39	268.13	183.4	378.64	218.68	194.54	662.4	396.18	248.73	219.06	222.092	3.06313	1.52671	2.58116	2.48001	1.20492	0.984637	0.875943	2.98255	1.78386	1.11994	2.17119	0.693981	0.0277045	1.54938	0.783048	0.254878
Aspartic acid	OA	10964.9	11118.6	12217.8	8854.43	11443.4	9642.69	7826.1	8136.53	8885.37	7912.71	10209.6	7638.58	12750.2	9010.52	11209.1	10835.6	7868.68	9573.41	7055.58	7363.87	10919.8	10163.6	0.883044	0.716687	0.745115	0.813692	0.724619	1.06612	0.774201	0.94193	0.6942	0.724533	0.776631	0.0632282	0.00596531	0.840197	0.141732	0.191097
3, 4-dihydroxy benzoic acid	Others	197.16	160.97	90.93	113.29	119.28	136.88	115.89	131.19	128.84	131.53	121.43	156.13	136.6	120.27	149.34	177.09	121.79	159.32	109.96	129.73	136.326	136.754	1.00406	0.850095	0.962326	0.945088	0.96482	1.29495	0.890577	1.16501	0.804072	0.948638	0.945278	0.0513579	0.708914	1.02065	0.18171	0.849067
Benzoic acid	Others	32.83	24.13	22.44	29.71	27.37	18.54	18.21	26.77	46.19	28.66	36.01	27.4	25.24	25.51	34.29	19.52	17.8	17.97	27.25	27.45	27.296	29.69	0.67922	0.667131	0.98073	1.69219	1.04997	0.65746	0.599528	0.605254	0.917817	0.924554	1.01385	0.372757	0.946119	0.740923	0.148577	0.0414044
Benzylalcohol	Others	0.91	4.29	7.02	1.2	4.15	6.54	4.79	3.73	1.53	0.55	1.72	0.69	1.65	0.77	0.08	7.05	1.43	3.51	0.83	15.73	3.514	0.982	1.86113	1.36312	1.06147	0.435401	0.156517	7.17923	1.45621	3.57434	0.845214	16.0183	0.975526	0.617157	0.957509	5.81466	5.56215	0.123726
Citric acid	OA	1187.68	966.56	366.02	1838.93	507.11	17356.9	14761.6	5930.94	15250.5	1971.69	441.61	1185.41	728.61	1135.59	1569.45	3759.27	2570.97	2667.16	1991.55	3504.86	973.26	1012.13	17.8338	15.1672	6.09389	15.6695	2.02586	3.7142	2.54015	2.63518	1.96767	3.46284	11.358	6.16172	0.010092	2.86401	0.639076	0.00106001
Dehydroascorbic acid	OA	962.1	856.68	794.28	633.02	781.09	919.07	874.73	879.07	1094.67	824.77	934.52	742.54	1293.67	715.51	1398.97	1346.23	655.52	1317.49	656.82	403.72	805.434	1017.04	1.14109	1.08604	1.09142	1.35911	1.02401	1.32367	0.644536	1.29541	0.645814	0.396955	1.14033	0.115528	0.150215	0.861278	0.377168	0.56941
Dehydroascorpic acid dimer	OA	1222.25	1204.9	902.97	762.6	895.73	1342.56	1225.6	1273.98	1507.18	1209.13	1324.08	919.06	1810.37	875.55	1723.44	1400.07	906.23	1574.97	914.8	534.09	997.69	1330.5	1.34567	1.22844	1.27693	1.51067	1.21193	1.05229	0.68112	1.18374	0.687561	0.401421	1.31473	0.108437	0.0184123	0.801227	0.281617	0.356787
Erythritol	Others	25.98	19.45	16.52	5.53	26.37	52.3	40.06	31.13	42.22	61.11	13.02	28.86	21.95	10.14	21.52	57.35	41.24	31.41	45.7	59.63	18.77	19.098	2.78636	2.13426	1.6585	2.24933	3.25573	3.00293	2.15939	1.64467	2.39292	3.12232	2.41684	0.551955	0.00327546	2.46445	0.546436	0.00199028
Erythrose	Others	11.72	8.46	7.24	2.51	11.67	22.53	17.14	11.55	18.02	25.51	6.48	13.92	11.28	4.27	9.62	22.57	16.8	12.76	20.87	25.25	8.32	9.114	2.70793	2.0601	1.38822	2.16587	3.06611	2.47641	1.84332	1.40004	2.28988	2.77046	2.27764	0.575798	0.00678457	2.15602	0.483196	0.00539151
Fructose	SUG	598.48	403.63	1426.06	735.88	1278.08	5409.69	1921.11	1734.14	1849.59	2213.57	743.89	1060.37	649.61	686.04	429.1	1208.43	7008.15	487.01	4794.53	3232.38	888.426	713.802	6.08907	2.16237	1.95192	2.08187	2.49156	1.69295	9.81806	0.682276	6.71689	4.5284	2.95536	1.57696	0.044095	4.68771	3.33093	0.0584297
F6F	Others	77.04	44.91	21.41	70.27	23.79	39.2	32.15	26.02	37.29	26.57	45.84	31.88	69.18	27.52	32.24	55.8	24.94	32.12	23.38	15.68	47.484	41.332	0.825541	0.67707	0.547974	0.785317	0.559557	1.35004	0.603407	0.777122	0.565663	0.379367	0.679092	0.113328	0.232689	0.73512	0.332421	0.316778
Fucose	SUG	805.9	374.89	313.16	341.1	400.53	694.07	484.52	542.98	643.2	633.87	464.8	591.31	775.53	296.48	466.02	660.78	569.98	496.76	592.52	315.21	447.116	518.828	1.55233	1.08366	1.21441	1.43855	1.41769	1.2736	1.09859	0.957466	1.14204	0.607542	1.34133	0.168705	0.159605	1.01585	0.22774	0.935865
Fumaric acid	OA	244.87	220.11	121.1	446.19	161.07	255.06	221.4	275.14	284.21	233.27	160.32	237.97	206.53	234.45	368.7	886.97	353.93	630.7	215.59	433.87	238.668	241.594	1.06868	0.927648	1.15281	1.19082	0.977383	3.67132	1.46498	2.61058	0.892365	1.79586	1.06347	0.100085	0.798897	2.08702	0.967785	0.0634143
Gaba	Others	190.87	185.3	882.58	208.28	445.26	279.61	232.05	225.44	170.15	365.1	242.55	115.16	343.44	524.65	805.47	0.71	75.53	52.41	315.94	244.12	382.458	406.254	0.731087	0.606733	0.58945	0.444885	0.954615	0.00174768	0.185918	0.129008	0.777691	0.600905	0.665354	0.170761	0.381077	0.339054	0.297427	0.0809932
Galactoinol	SUG	1200.51	294.94	35.41	1402.46	26.51	45.55	35.84	29.85	49.43	37.84	160.08	1799.77	267.41	640.45	583.73	78.65	33.64	50.65	51.67	61.7	591.966	690.288	0.076947	0.060544	0.0504252	0.0835014	0.0639226	0.113938	0.0487333	0.0733752	0.0748528	0.089383	0.067068	0.0118075	0.0984729	0.0800564	0.0213906	0.0613961
Galactonic acid	OA	37.7	19.61	20.06	26.97	22.98	49.42	44.98	45.72	59.88	47.77	22.8	36.07	46.73	23.35	38.01	48.35	30.19	35.14	45.95	25.22	25.464	33.392	1.94078	1.76642	1.79548	2.35156	1.87598	1.44795	0.904109	1.05235	1.37608	0.755271	1.94604	0.211808	0.000496727	1.10715	0.267027	0.590922
Galacturonic acid	OA	25.28	11.79	23.42	18.84	19.46	161.54	134.4	80.9	123.37	117.04	17.46	10.37	25.81	18.52	40.54	44.29	62.66	214.78	99.8	24.04	19.758	22.54	8.17593	6.80231	4.09454	6.24405	5.92368	1.96495	2.77995	9.52884	4.42768	1.06655	6.2481	1.32414	5.21694e-05	3.95359	2.99918	0.0873465
G-1-P	Others	366.46	319.63	283.98	343.42	265	808.55	656.64	653.47	953.38	754.71	533.3	529.06	665.86	451.66	560.23	1017.76	796.94	744.14	884.12	821.18	315.698	548.022	2.56115	2.07996	2.06992	3.01991	2.39061	1.85715	1.45421	1.35787	1.61329	1.49844	2.42431	0.351787	5.86612e-05	1.55619	0.171409	0.000796027
Glucose	SUG	592.34	239.7	437.9	652.06	457.78	2390.5	2404.28	1600.53	2196.76	819.8	261.29	511.23	596.15	482.33	346.81	1649.8	2648.27	1408.65	2562.48	858.42	475.956	439.562	5.02252	5.05148	3.36277	4.61547	1.72243	3.75328	6.02479	3.20467	5.82962	1.9529	3.95493	1.27383	0.00196112	4.15305	1.56296	0.0040922
G6P	Others	132.35	79.06	33.78	172.69	27.8	137.28	107.04	79.5	114.11	67.58	66.08	178.36	131.35	104.3	112.7	156.13	76.85	87.02	69.86	71.58	89.136	118.558	1.54012	1.20086	0.891896	1.28018	0.758167	1.31691	0.648206	0.733987	0.589247	0.603755	1.13424	0.279512	0.707101	0.778421	0.273932	0.314891
Glucuronic acid lacton	Others	5.54	1.34	1.24	4.23	0.21	0.92	2.64	3.32	3.57	5.88	2.84	10.82	3.82	2.65	2.5	3.61	3.79	11.14	4.06	1.39	2.512	4.526	0.366242	1.05096	1.32166	1.42118	2.34076	0.797614	0.837384	2.46133	0.897039	0.307114	1.30016	0.637538	0.57473	1.0601	0.73151	0.908599
Glutamic acid	OA	10351.6	10176.6	10807.4	8824.8	10408.5	13822.9	11798.1	12958.5	12735.7	11708.5	10809.7	7775.57	13164.1	9383.83	12200.1	13208.4	10919	14141	10745	10687.9	10113.8	10666.6	1.36673	1.16654	1.28127	1.25924	1.15768	1.23829	1.02366	1.32572	1.00734	1.002	1.24629	0.0776014	0.00134296	1.1194	0.1358	0.321905
Glutamine	AA	23.84	16.64	4.94	32.48	8.45	68.26	47.01	48.59	62.07	45.19	7.59	19.53	13.31	17.18	23.01	100.17	57.54	65.1	35.76	86.27	17.27	16.124	3.95252	2.72206	2.81355	3.59409	2.61668	6.21248	3.56859	4.03746	2.21781	5.35041	3.13978	0.533198	0.000628545	4.27735	1.39268	0.00180126
2oxo- glutaric acid	OA	1083.68	631.19	697.19	1064.61	620.28	834.72	777.54	700.75	948.04	955.72	759.39	805.57	1281.86	573.69	903.64	941.54	686.44	645.14	696.12	550.61	819.39	864.83	1.01871	0.948925	0.855209	1.15701	1.16638	1.0887	0.793728	0.745973	0.804921	0.636668	1.02925	0.119983	0.841258	0.813998	0.149685	0.263984
Glyceric acid	OA	919.47	531.29	509.86	137.6	686.43	824.08	536.9	674.71	654.18	644.5	848.31	588.98	1248.21	260.71	362.49	1132.62	646.5	928.59	848.81	747.5	556.93	661.74	1.47968	0.964035	1.21148	1.17462	1.15724	1.71158	0.97697	1.40326	1.28269	1.1296	1.19741	0.165211	0.441828	1.30082	0.250496	0.340565
Glycerol	Others	527.46	332.27	454.55	448.38	718.85	500.77	278.71	515.93	362.78	426.55	332.25	537.91	492.39	426.53	496.93	637.46	273.07	373.71	539.11	1346.64	496.302	457.202	1.009	0.561573	1.03955	0.730966	0.859457	1.39426	0.597263	0.817385	1.17915	2.94539	0.840109	0.177859	0.336362	1.38669	0.827042	0.385146
G-2-P	Others	1.07	4.02	3.05	49.56	2.23	11.92	6.83	9.97	12.47	8.73	6.67	0.3	10.3	3.52	13.23	18.62	6.19	50.31	13.33	8.45	11.986	6.804	0.994494	0.569831	0.831804	1.04038	0.72835	2.73663	0.909759	7.39418	1.95914	1.24192	0.832972	0.172799	0.837737	2.84832	2.35824	0.170387
G-3-P	Others	180.34	95.74	146.47	145.57	125.56	334.66	247.22	258.05	358.8	261.18	117.62	131.44	166.65	122.67	147.53	517.15	170.72	359.06	310.79	308.66	138.736	137.182	2.41221	1.78195	1.86001	2.58621	1.88257	3.76981	1.24448	2.6174	2.26553	2.25	2.10459	0.328572	0.000433339	2.42944	0.811803	0.00835592
Glycine	AA	640.17	503.34	938.83	429.77	745.58	3690.8	2636.54	1791.51	2990.56	2221.95	775.98	615.14	1099.44	528.12	727.3	2035.47	1497.34	1380.1	2420.38	1174.17	651.538	749.196	5.66475	4.04664	2.74966	4.59	3.41032	2.71687	1.9986	1.84211	3.23064	1.56724	4.09227	0.999016	0.000335968	2.27109	0.612068	0.00508041
Glycolic acid	Others	37.13	33.27	44.5	55.99	58.57	101.16	90.11	123.52	117.82	110.68	99.45	89.68	89.46	77.07	85.45	211.8	105.29	298.92	189.27	204.86	45.892	88.222	2.20431	1.96352	2.69154	2.56733	2.41175	2.40076	1.19347	3.38827	2.14538	2.3221	2.36769	0.259507	4.10157e-05	2.29	0.69897	0.00634618
Histidine	AA	17.79	15.39	21.41	11.81	14.22	64.15	66.54	31.52	59.23	33.13	20.97	17.44	23.93	15.48	20.92	14.4	18.51	31.68	60.57	19.27	16.124	19.748	3.97854	4.12677	1.95485	3.67341	2.0547	0.729188	0.93731	1.60421	3.06715	0.975795	3.15765	0.95313	0.00220191	1.46273	0.853865	0.3169
Homoserine	AA	79.15	73.8	116.97	89.04	98.25	50.51	36.19	38.63	40.2	27.3	48.17	53.52	75.16	85.08	103.07	33.15	15.53	41	16.34	14.84	91.442	73	0.552372	0.39577	0.422454	0.439623	0.29855	0.45411	0.21274	0.561644	0.223836	0.203288	0.421754	0.0815295	0.000253073	0.331123	0.148413	0.00279235
myo- insitol	SUG	2130.9	1523.34	1524.09	1476.39	998.61	967.07	717.83	1010.44	1025.38	803.23	1279.75	1749.22	1753.74	1118.06	1650.99	894.44	509.76	573.03	864.92	679.46	1530.67	1510.35	0.631797	0.468966	0.660131	0.669891	0.524759	0.592206	0.337511	0.379402	0.572661	0.449869	0.591109	0.0799344	0.0109274	0.46633	0.101561	0.00071945
Isolucine	AA	203.98	149.89	279.61	202.2	184.38	2511.73	2326.96	836.61	1498.79	670.85	221.74	224.58	263.02	203.62	268.71	456.94	848.84	487.52	2924.06	1642.54	204.012	236.334	12.3117	11.406	4.10079	7.34658	3.28829	1.93345	3.5917	2.06284	12.3726	6.95008	7.69067	3.67543	0.00663762	5.38213	3.93552	0.0566365
Lactic acid	OA	24.31	29.56	29.62	91.14	36.3	19.22	19.86	36.02	31.81	45.4	72.5	63.85	39.95	79.84	58.05	34.83	35.28	33.11	21.17	25.87	42.186	62.838	0.455601	0.470772	0.853838	0.754042	1.07619	0.554282	0.561444	0.52691	0.336898	0.411694	0.722088	0.235771	0.405323	0.478246	0.0888596	0.00214211
Leucine	AA	226.47	153.47	401.61	211.01	187.46	3003.44	2284.7	1115.3	1291.52	744.67	236.76	251.12	334.4	203.06	268.87	535.81	880.32	848.17	3578.18	1800.42	236.004	258.842	12.7262	9.68077	4.72577	5.47245	3.15533	2.07003	3.40099	3.27679	13.8238	6.95567	7.15211	3.52555	0.00842595	5.90546	4.28243	0.0513283
Lysine	AA	246.41	87.62	160.88	136.07	71.83	1056.15	754.03	490.39	551.44	327.86	148.49	156.24	260.4	116.52	201.29	175.97	244.76	540.72	881.63	216.59	140.562	176.588	7.51377	5.36439	3.48878	3.92311	2.33249	0.9965	1.38605	3.06204	4.99258	1.22653	4.52451	1.78216	0.00494856	2.33274	1.51737	0.122446
2-methyl-malic acid	Others	8.48	8.29	1.99	19.09	3.6	6.02	5.21	10.33	8.12	7.42	5.61	16.11	7.96	11.96	17.97	47.18	16.47	33.47	4.14	12.86	8.29	11.922	0.726176	0.628468	1.24608	0.979493	0.895054	3.95739	1.38148	2.80741	0.347257	1.07868	0.895054	0.214447	0.787157	1.91444	1.29689	0.214072
Malic acid	OA	5850.2	6310.99	2733.5	9779.4	3481.99	10698.9	10479.1	9931.17	9860.69	9413.85	3503.77	6297.3	4415.27	5684.7	7793.38	14885.3	13938.6	13060.5	8148.63	11079.4	5631.22	5538.88	1.89992	1.8609	1.76359	1.75108	1.67173	2.68742	2.5165	2.35796	1.47117	2.0003	1.78944	0.0816185	0.00777621	2.20667	0.432101	0.00145944
Maltose	SUG	129.1	248.43	403.97	108.81	82.34	719.16	540.3	525.21	113.9	654.24	99.56	112.49	209.51	67.07	449.41	249.81	99.7	107.08	124.68	139.14	194.53	187.608	3.69691	2.77746	2.69989	0.585514	3.36318	1.33155	0.531427	0.570765	0.664577	0.741653	2.62459	1.08464	0.0312057	0.767995	0.291153	0.576597
Methionine	AA	236.05	193.4	194.6	161.74	170.06	242.42	181.9	166.09	181.11	118.67	134.83	134.39	144.02	159.95	247.27	107.39	71.43	110.2	184.35	128.45	191.17	164.092	1.26809	0.951509	0.868808	0.947377	0.620756	0.65445	0.435305	0.671574	1.12346	0.782793	0.931307	0.207091	0.593782	0.733515	0.225166	0.159563
Nicotinic acid	Others	152.64	80.65	59.38	84.08	64.32	130.89	69.81	105.67	73.54	67.29	141.23	138.03	221.42	95.51	92.45	153.49	77.27	135.78	94.32	182.8	88.214	137.728	1.48378	0.791371	1.19788	0.833655	0.762804	1.11444	0.561033	0.985856	0.684828	1.32725	1.0139	0.282734	0.954665	0.934683	0.279673	0.773545
Ornithine	AA	101.79	83.69	99.55	94.02	70.8	216.61	165.83	136.13	158.53	118.29	93.66	107.35	131.71	98.64	151.64	100.26	90.41	151.4	168.1	40.9	89.97	116.6	2.40758	1.84317	1.51306	1.76203	1.31477	0.859863	0.775386	1.29846	1.44168	0.350772	1.76812	0.370178	0.00438877	0.945232	0.390063	0.806581
Phenylalanine	AA	368.26	291.19	342.09	158.09	328.64	901.67	666.93	785.64	729.73	639.76	380.32	232.13	575.05	264.58	429.92	647.4	523.73	815.3	882.15	677.12	297.654	376.4	3.02926	2.24062	2.63944	2.4516	2.14934	1.71998	1.39142	2.16605	2.34365	1.79894	2.50205	0.313724	6.91656e-05	1.88401	0.336928	0.00549205
Phosphoric acid	Others	29621.7	28255.6	18913.5	37027.5	21343.2	33514.8	27030.2	29181.1	26383.9	27733.4	24966.6	28093.2	31639.6	28278.8	31691.5	28641.5	23926.5	30899	24062.3	23337.3	27032.3	28933.9	1.2398	0.999921	1.07949	0.976014	1.02593	0.989891	0.826936	1.06791	0.83163	0.806572	1.06423	0.0942801	0.628897	0.904589	0.104797	0.199094
Pipecolic acid	Others	49.3	44.12	36.16	46.08	39.9	70.3	31.08	38.72	47.28	93.19	40.08	42.52	44.29	40.82	48.72	185.21	44.2	110.24	36.44	123.22	43.112	43.286	1.63064	0.720913	0.898126	1.09668	2.16158	4.27875	1.02112	2.54678	0.841843	2.84665	1.30159	0.527221	0.294757	2.30703	1.26781	0.0735169
4-hydroxy-proline	Others	10.11	6.49	1.5	5.39	19.27	34.61	36.53	25.47	38.29	28.46	3.08	11.29	4.28	3.96	4.4	50.35	28.08	65.78	24.27	18.19	8.552	5.402	4.04701	4.27152	2.97825	4.47732	3.32788	9.32062	5.19807	12.177	4.49278	3.36727	3.82039	0.572396	0.000254832	6.91114	3.3129	0.00784487
Proline	AA	1009.81	1014.83	1643.18	810.14	1116.18	44362.8	40282.6	35583.8	37903	34691.1	2150.92	926.09	1802.37	1098.46	1310.41	46920.1	34354.6	51814	30943.7	34621.3	1118.83	1457.65	39.6511	36.0043	31.8046	33.8774	31.0066	32.1889	23.5685	35.5462	21.2285	23.7514	34.4688	3.11925	2.40065e-08	27.2567	5.57265	1.33541e-05
Putrescine	Others	265.37	124.84	213.36	177.65	65.49	225.72	178.64	95.87	170.28	136.02	174.98	109.42	216.4	89.75	148.34	138.96	170.73	266.57	211.47	59.85	169.342	147.778	1.33292	1.05491	0.566132	1.00554	0.803227	0.940329	1.15531	1.80385	1.431	0.404999	0.952546	0.256743	0.84911	1.1471	0.470204	0.61453
Pyroglutamic acid	OA	15424.5	13708.8	17346.2	10892.2	15190.6	19634	16303.1	17642.5	18293.1	16947.3	17159.3	9582.65	22361.4	13965.7	18615.6	17767.7	15742.2	20472.8	15974.1	14468.2	14512.5	16336.9	1.35291	1.12339	1.21568	1.26051	1.16778	1.08758	0.963597	1.25316	0.977789	0.88561	1.22405	0.0791231	0.0283726	1.03355	0.127308	0.824978
Pyruvic acid	OA	908.99	605.94	472.53	597.63	452.69	481.97	345.95	353.6	494.38	427.25	587.48	809.7	988.06	516.94	579.16	573.33	398.96	451.13	416.5	325.24	607.556	696.268	0.793293	0.569413	0.582004	0.813719	0.703227	0.823433	0.572998	0.647926	0.598189	0.467119	0.692331	0.102302	0.0647051	0.621933	0.116794	0.0266809
3-caffeoyl-quinic I	Others	232.82	79.91	2.67	76.89	94.49	0.08	0.12	0.25	0.38	0.55	26.51	480.34	83.67	69.17	46.82	0.6	0.13	0.3	0.13	0.36	97.356	141.302	0.000821726	0.00123259	0.0025679	0.0039032	0.00564937	0.00424622	0.000920015	0.00212311	0.000920015	0.00254773	0.00283496	0.00177505	0.0319948	0.00215142	0.00123116	0.137001
3-caffeoyl-quinic II	Others	7.64	3.17	0.81	1.47	3.57	0.22	1.8	0.13	1	0.03	1.5	10.26	4.55	1.53	2.37	0.11	0.2	0.33	0.2	0.21	3.332	4.042	0.0660264	0.540216	0.0390156	0.30012	0.0090036	0.0272143	0.0494805	0.0816428	0.0494805	0.0519545	0.190876	0.20283	0.0614192	0.0519545	0.0173535	0.048838
Qunic acid	Others	4857.85	3194.13	643.49	4787.84	1576.56	4.63	3.03	3.72	65.43	3.6	1501.13	8600.17	2280.5	3184.03	2911.37	247.06	94.47	102.9	65.81	61.95	3011.97	3695.44	0.0015372	0.00100598	0.00123507	0.0217233	0.00119523	0.0668554	0.0255639	0.0278451	0.0178084	0.0167639	0.00533936	0.00819374	0.00754159	0.0309674	0.0184488	0.0217742
Raffinose	SUG	2404.97	1715.62	2278.99	1075.96	1755.46	1274.31	925.24	1419.97	1453.85	1528.26	2359.29	1506.38	2883.9	1524.58	1934.92	3740.85	1793.49	1511.43	707.22	1885.56	1846.2	2041.81	0.690234	0.501159	0.769131	0.787482	0.827787	1.83212	0.878381	0.740239	0.346368	0.923473	0.715159	0.115971	0.0773207	0.944116	0.488297	0.844528
Rhamnose	SUG	109.77	69.25	40.71	15.96	52.05	431.39	71.14	84.07	133.87	927.32	38.1	63.82	46.77	26.38	58.61	280.45	133.06	75.78	180.93	1088.01	57.548	46.736	7.49618	1.23619	1.46087	2.32623	16.1139	6.00073	2.84706	1.62145	3.87132	23.2799	5.72666	5.67361	0.135787	7.52409	8.00781	0.142098
Serine	AA	7436.98	7976.07	13669	3944.27	9531.62	14547.5	11965.8	14817.9	11655.5	11790.9	11213	2904.12	12424.5	8531.77	11971.8	10182	10286.8	15192.2	11408.2	11312.4	8511.59	9409.02	1.70915	1.40582	1.74091	1.36937	1.38528	1.08215	1.09329	1.61464	1.21247	1.20229	1.52211	0.166392	0.0333159	1.24097	0.194408	0.286182
Serine-o-actyle	Others	357.46	669.82	541.73	580.55	307.89	1461.85	1220.64	1691.69	1269.4	804.99	392.61	321.15	334.32	309.05	363.86	2043.75	533.45	2458.43	788.19	1837.33	491.49	344.198	2.97432	2.48355	3.44196	2.58276	1.63786	5.93772	1.54983	7.14249	2.28993	5.338	2.62409	0.597611	0.00115612	4.45159	2.16001	0.0127409
Succinic acid	OA	278.91	219.86	152.35	510.18	201.51	122.35	107.9	129.59	132.56	142.85	164.43	244.43	215.26	387.75	401.31	236.38	123.04	170.83	98.26	203.2	272.562	282.636	0.448889	0.395873	0.475451	0.486348	0.524101	0.836341	0.43533	0.604417	0.347656	0.718946	0.466132	0.042637	0.0497956	0.588538	0.178976	0.062651
Sucrose	SUG	19406.5	17595.7	15063.3	16392.2	14129.6	24942.3	21481.4	17886.3	4944.17	17587.5	12367.6	14302.7	16059.3	13428.2	14956.5	29004.1	18429.2	21659.4	21204	23834.6	16517.4	14222.9	1.51006	1.30053	1.08287	0.29933	1.06478	2.03926	1.29575	1.52286	1.49084	1.67579	1.05152	0.409686	0.814516	1.6049	0.248601	0.00179646
Trehalose	SUG	75.88	42.64	29.81	38.33	41.67	57.21	44.02	37.97	66.82	56.02	50.45	48.59	95.21	36.6	66.88	83.11	50.51	46.09	66.5	57.58	45.666	59.546	1.25279	0.963956	0.831472	1.46323	1.22673	1.39573	0.848252	0.774023	1.11678	0.966984	1.14764	0.223881	0.493478	1.02035	0.220613	0.922541
Threonic acid	OA	302.85	273.92	299.19	283.36	314.37	217.53	176.01	183.01	206.13	196.48	239.81	258.25	299	243.31	287.79	294.64	202.28	235.35	167.28	190.13	294.738	265.632	0.738045	0.597174	0.620924	0.699367	0.666626	1.1092	0.761505	0.886	0.629743	0.715765	0.664427	0.0511091	1.24456e-05	0.820443	0.16642	0.0938767
Threonine	AA	1358.82	1333.88	2242.14	915.75	1753.88	3657.88	3004.56	3031.77	2986.02	2748.24	1830.58	723.35	2587.99	1500.67	2348.65	2987.19	2083.7	2885.8	2916.87	2080.22	1520.89	1798.25	2.40509	1.97552	1.99341	1.96333	1.80699	1.66117	1.15874	1.60478	1.62206	1.1568	2.02887	0.199583	0.000411498	1.44071	0.231742	0.0765293
Tryptophan	AA	43.42	24.66	24.92	27.34	17.51	193	131.32	42.14	62.99	48.35	18.79	31.98	28.12	24.11	27.77	29.74	58.46	29.93	283.54	216.31	27.57	26.154	7.00036	4.76315	1.52847	2.28473	1.75372	1.13711	2.23522	1.14438	10.8412	8.27063	3.46609	2.10977	0.0494755	4.7257	4.04653	0.103075
Tyrosine	AA	350.03	205.44	343.07	251.28	236.88	1160.87	818.73	937.58	1080.85	782.23	344.8	299.77	463.04	259.24	427.01	894.54	802.1	1191.75	993.48	670.22	277.34	358.772	4.18573	2.95208	3.38062	3.8972	2.82047	2.49334	2.23568	3.32175	2.76911	1.86809	3.44722	0.527312	2.54468e-05	2.53759	0.491902	0.000434818
Urea	Others	50.81	53.47	123.38	269.48	94.33	211.74	164.68	149.37	166.8	178.28	191.3	155.15	117.18	163.65	141.43	53.21	110.54	107.07	141.62	87.37	118.294	153.742	1.78995	1.39212	1.2627	1.41005	1.50709	0.346099	0.718997	0.696426	0.921154	0.56829	1.47238	0.176831	0.214779	0.650193	0.189458	0.0222742
Valine	AA	848.9	755.24	1522.85	751.65	1101.51	6619.74	6103.44	3158.05	4561.01	2480.38	1214.99	873.94	1616.03	1017.02	1287.12	3221.79	3124.75	3372.93	7018.26	6017.98	996.03	1201.82	6.64613	6.12777	3.17064	4.57919	2.49027	2.68076	2.60001	2.80652	5.83969	5.00739	4.6028	1.61339	0.00230553	3.78687	1.36359	0.00373786
DGDG 32:3	Digalactosyl-Diacylglycerol	428.107	371.563	631.711	326.77	470.988	253.709	303.577	240.184	307.237	297.017	560.766	426.354	708.96	347.03	496.036	232.489	239.131	259.332	245.254	186.755	445.828	507.829	0.569073	0.680929	0.538737	0.689137	0.666215	0.45781	0.470889	0.510667	0.482945	0.36775	0.628818	0.0623484	0.0159314	0.458012	0.0483885	0.00234292
DGDG 32:1	Digalactosyl-Diacylglycerol	577.253	457.393	476.866	525.351	753.688	512.51	557.179	396.654	564.068	527.574	579.087	543.079	736.159	473.174	607.512	834.805	550.335	867.751	506.925	637.473	558.11	587.802	0.918295	0.998332	0.71071	1.01068	0.945286	1.42021	0.936259	1.47626	0.862408	1.0845	0.91666	0.108395	0.468546	1.15593	0.249789	0.313747
DGDG 32:0	Digalactosyl-Diacylglycerol	1662.35	1323.18	1734.8	1308.93	2009.07	3387.26	3538.18	2805.66	4187.31	3768.91	1648.73	1986.23	2104.59	1285.61	1890.71	4988.58	2920.21	4644.56	3261.28	2707.67	1607.66	1783.17	2.10694	2.20082	1.74518	2.60459	2.34434	2.79759	1.63765	2.60466	1.82892	1.51845	2.20037	0.282862	8.11119e-05	2.07745	0.522344	0.00430535
DGDG 34:4	Digalactosyl-Diacylglycerol	153.325	172.872	632.848	0	422.832	1776.56	1649.7	1406.15	1879.67	1703.74	394.985	26.7154	560.505	70.8653	474.539	1480.46	1474.42	1425.4	1768.44	1509.97	276.376	305.522	6.42806	5.96903	5.08782	6.80114	6.16458	4.84568	4.82591	4.66547	5.78825	4.94227	6.09013	0.57351	7.0318e-06	5.01352	0.397441	9.292e-06
DGDG 34:3	Digalactosyl-Diacylglycerol	57.181	52.2536	47.3229	42.6254	79.9879	37.603	55.6781	32.6039	68.7307	67.5793	54.5821	59.7128	79.5849	32.6168	57.5149	54.3735	34.7258	65.1805	52.6453	18.7635	55.8742	56.8023	0.672995	0.996492	0.583524	1.2301	1.20949	0.957241	0.611345	1.1475	0.926817	0.330329	0.93852	0.267705	0.737773	0.794646	0.288998	0.324125
DGDG 34:2	Digalactosyl-Diacylglycerol	26693.4	21730.2	21890.3	23288.3	24568.6	40412.9	39596.9	34272.4	48467.7	39812.9	22579.6	28283.6	24219.8	22486.7	26287.8	45127.3	38247.5	34700.8	42761.2	33347	23634.2	24771.5	1.70994	1.67541	1.45012	2.05075	1.68455	1.82174	1.54401	1.40083	1.72623	1.34619	1.71415	0.192564	0.000127843	1.5678	0.182834	0.000528376
DGDG 34:0	Digalactosyl-Diacylglycerol	539.75	367.432	433.081	513.689	477.005	491.29	519.206	536.221	559.239	433.7	320.888	588.092	373.836	364.165	625.328	664.534	457.483	691.789	417.375	362.729	466.191	454.462	1.05384	1.11372	1.15022	1.19959	0.930305	1.46224	1.00665	1.52222	0.918395	0.798151	1.08953	0.0927449	0.296845	1.14153	0.294507	0.504083
DGDG 36:6	Digalactosyl-Diacylglycerol	247321	239892	283418	202350	292543	305350	306072	284503	315974	302996	294559	260615	316334	237326	286840	346117	301148	318181	325010	332836	253105	279135	1.20642	1.20927	1.12405	1.24839	1.19712	1.23996	1.07886	1.13988	1.16435	1.19238	1.19705	0.0405014	0.018916	1.16309	0.0536704	0.0195855
DGDG 36:5	Digalactosyl-Diacylglycerol	928.469	957.579	1319.73	714.984	1238.54	1295.25	1244.7	1154.8	1258.65	1237.53	1095.7	728.591	1268.16	876.332	1225.14	1532.74	1274.39	1329.11	1271.51	1343.89	1031.86	1038.79	1.25526	1.20627	1.11914	1.21979	1.19932	1.47551	1.22681	1.27948	1.22403	1.29372	1.19995	0.044773	0.103853	1.29991	0.0920794	0.0255278
DGDG 36:4	Digalactosyl-Diacylglycerol	22096.2	20997.8	23711.8	25350.3	24880.2	25791.3	28181.7	21272.3	28556.3	27181.5	17449.8	21051.8	19798.6	23361	26396.7	30292.7	25116	26730.7	24615.9	23875.5	23407.2	21611.6	1.10185	1.20397	0.908791	1.21998	1.16124	1.40169	1.16216	1.23687	1.13901	1.10476	1.11917	0.112856	0.110889	1.2089	0.105703	0.0457064
DGDG 36:2	Digalactosyl-Diacylglycerol	6353.46	4353.77	3619.87	7768.17	4284.75	2920.26	2833.02	2245.54	3581.01	2647.1	3792.74	6918.71	4089.03	5965.63	6177.79	4769.11	3570.39	3683.22	2740.72	2530.43	5276	5388.78	0.553498	0.536963	0.425613	0.678735	0.501724	0.885008	0.662561	0.683498	0.508598	0.469574	0.539307	0.082445	0.0163788	0.641848	0.147462	0.0297183
DGDG 38:6	Digalactosyl-Diacylglycerol	11199.4	12292	19800.3	8007.35	15041.4	14829.6	16092.8	13005.3	14596.4	15084.9	15746.7	10256.4	18859.7	11149.4	15624.1	15655	12776.8	14662.4	14274.7	15234.1	13268.1	14327.3	1.11769	1.2129	0.980193	1.10011	1.13693	1.09267	0.89178	1.02339	0.996332	1.06329	1.10956	0.0752578	0.497536	1.01349	0.0692177	0.910735
DGDG 38:5	Digalactosyl-Diacylglycerol	1499.61	1228.6	1197.56	1253.76	1046.3	1391.13	1382.63	968.519	1389.59	1310.81	1441.61	1917	1608.93	1375.67	1603.48	1817.09	1254.71	1186.69	1264.09	1462.65	1245.17	1589.34	1.11723	1.1104	0.777823	1.11599	1.05272	1.1433	0.789455	0.746658	0.795359	0.92029	1.03483	0.130736	0.702162	0.879012	0.144282	0.230175
MGDG 32:1	Monogalactosyldiacylglycerol	550.183	403.846	221.193	524.889	287.315	435.757	419.609	337.293	467.146	438.068	322.847	311.652	352.423	384.307	458.782	723.359	625.251	757.481	352.308	291.331	397.485	366.002	1.09628	1.05566	0.848569	1.17525	1.1021	1.97638	1.70833	2.06961	0.962585	0.795983	1.05557	0.11045	0.753581	1.50258	0.525207	0.102188
MGDG 32:0	Monogalactosyldiacylglycerol	17.1497	10.9443	42.0598	13.7693	33.2213	139.29	151.539	152.684	204.884	192.933	22.5317	24.5199	17.4473	10.7578	21.7978	180.201	79.6822	141.586	107.932	61.6244	23.4289	19.4109	5.94523	6.46806	6.51693	8.74494	8.23484	9.28352	4.10502	7.29417	5.5604	3.17473	7.182	1.09844	7.39165e-06	5.88357	2.19795	0.00224236
MGDG 34:2	Monogalactosyldiacylglycerol	5701.72	5631.25	6255.03	4673.44	5905.19	15309.2	14422.9	17324	22444.2	16221.8	5539.55	5627.12	7141.48	4950.06	6569.83	16242.1	12481.3	12553.6	13931.3	10237.3	5633.33	5965.61	2.71761	2.56028	3.07528	3.98418	2.87962	2.72263	2.09221	2.10433	2.33527	1.71605	3.04339	0.500491	4.26306e-05	2.1941	0.330527	0.000150542
MGDG 34:1	Monogalactosyldiacylglycerol	1435.28	1147.31	1026.4	1228.29	1063.15	1866.98	2117.69	3994.26	3248.12	3651.93	522.565	1160.71	739.667	885.032	1612.07	1987.37	855.654	921.268	1613.08	575.234	1180.09	984.009	1.58207	1.79452	3.38472	2.75244	3.09463	2.01967	0.869559	0.93624	1.63929	0.584582	2.52168	0.71246	0.00295961	1.20987	0.533263	0.540299
MGDG 36:5	Monogalactosyldiacylglycerol	116170	100660	101704	85012.5	107539	175650	160577	152623	218342	167316	121430	108481	149260	98512.8	124008	265795	201241	196324	177009	210117	102217	120338	1.7184	1.57094	1.49313	2.13607	1.63688	2.20873	1.67229	1.63143	1.47093	1.74605	1.71108	0.225085	0.000416982	1.74589	0.24833	0.000811143
MGDG 36:4	Monogalactosyldiacylglycerol	42245	38352.8	30665.5	28676.4	40606.6	37306.1	32899.7	32544.8	45306.7	37217	38517.6	35882.3	50077.2	35879.9	47733.4	58458.8	47513.9	41812	35146.4	39433.9	36109.3	41618.1	1.03314	0.911114	0.901286	1.25471	1.03068	1.40465	1.14166	1.00466	0.844499	0.947518	1.02619	0.127385	0.797296	1.0686	0.193514	0.586861
MGDG 36:3 (1)	Monogalactosyldiacylglycerol	2054.43	2090.33	3207.56	1758.13	2832.11	3514.83	4160	3988.92	4805.53	4412.06	1609.51	2427.43	2399.13	1725.46	2501.52	3418.48	2487.98	3731.79	3011.36	2103.58	2388.51	2132.61	1.47155	1.74167	1.67004	2.01194	1.8472	1.60296	1.16664	1.74987	1.41205	0.986389	1.74848	0.180023	0.000851428	1.38358	0.278543	0.0493208
MGDG 38:6	Monogalactosyldiacylglycerol	1136.73	1269.98	1380.25	1433.45	1239.32	1046.8	1187.61	1143.19	1121.61	1198.18	1238.18	1477.63	1262.43	1529.31	1390.45	1314.95	1535.29	1359.49	1442.3	1381.32	1291.95	1379.6	0.810254	0.919242	0.884862	0.868157	0.927426	0.953137	1.11285	0.985426	1.04545	1.00125	0.881988	0.041947	0.0326204	1.01962	0.0552924	0.704683
MGDG 38:4	Monogalactosyldiacylglycerol	1414.03	1198.32	1491.68	1163.07	1137.29	924.304	965.636	776.993	1043.93	1098.72	934.014	1234.06	1109.5	1269.3	1417.37	975.436	574.657	667.336	987.32	892.362	1280.88	1192.85	0.721618	0.753887	0.60661	0.815014	0.857785	0.817736	0.481751	0.559447	0.827698	0.748093	0.750983	0.0862796	0.00788613	0.686945	0.140725	0.0126598
PC 32:2 (1)	Phosphatidylcholine	4447.26	2790.19	1373.54	2769.94	3132.28	2222.38	2274.64	1682.06	2550.31	2109.45	2223.08	4098.24	2865.83	2076.16	2210.59	2920.16	2156.64	2847.22	1768.76	1069.46	2902.64	2694.78	0.76564	0.783646	0.579491	0.878616	0.726735	1.08364	0.800301	1.05657	0.656365	0.396863	0.746826	0.0974502	0.187764	0.798746	0.256678	0.319894
PC 32:1 (1)	Phosphatidylcholine	1234.28	791.659	853.412	1641.29	1003.25	2465.46	2764.25	1668.96	2609.81	2485.34	1323.67	1359.17	1784.58	1146.73	1443.56	4011.21	2726.16	4453.26	1916.79	1391.29	1104.78	1411.54	2.23164	2.50209	1.51067	2.3623	2.24963	2.84172	1.93133	3.15489	1.35794	0.985655	2.17127	0.344123	0.000741481	2.05431	0.83347	0.0374925
PC 32:0	Phosphatidylcholine	971.536	617.234	338.818	1330.71	613.54	2348.53	2722.1	1232.39	2429.99	2075.96	633.227	2056.98	708.333	954.91	1039.42	2678.63	2491.28	2788.33	2037.17	1160.98	774.368	1078.57	3.03283	3.51526	1.59148	3.13804	2.68085	2.4835	2.30979	2.5852	1.88877	1.0764	2.79169	0.656421	0.00193804	2.06873	0.550271	0.018659
PC 34:3	Phosphatidylcholine	47.328	22.2229	56.5939	116.444	83.4976	51.7369	20.7031	13.8467	31.869	27.6379	27.0944	35.6166	51.3482	77.1422	54.2295	54.8882	30.8513	28.219	15.3368	13.2643	65.2173	49.0862	0.7933	0.317448	0.212317	0.488658	0.423781	1.1182	0.628513	0.574887	0.312446	0.270225	0.447101	0.197007	0.0714213	0.580854	0.303177	0.108292
PC 34:2	Phosphatidylcholine	669.961	312.981	507.742	293.42	711.499	268.777	246.926	180.431	263.659	247.21	376.802	996.963	588.278	133.225	446.425	328.844	302.964	393.489	209.237	161.404	499.121	508.338	0.538502	0.494723	0.361497	0.528247	0.495292	0.646899	0.59599	0.77407	0.41161	0.317512	0.483652	0.0635248	0.0194453	0.549216	0.164263	0.161719
PC 34:1	Phosphatidylcholine	96654.1	81827.5	43109	89167.7	69668.5	35263.1	29794.2	34309.2	38683.8	42929.1	72606.8	91243.7	99496.1	80700	100121	73825.4	52052.1	62920	26512.7	23279.2	76085.3	88833.5	0.463467	0.391589	0.450931	0.508426	0.564223	0.831054	0.585952	0.708292	0.298454	0.262055	0.475727	0.0578706	0.00323359	0.537161	0.223921	0.0066094
PC 36:6	Phosphatidylcholine	16559.9	14260.2	18395.4	23072.4	14290.2	30004.7	30310	30767.1	29594.9	29882.6	17807.8	20795.5	19452.4	20224.2	20555.8	25189.8	29315.8	28665.5	29680	23429.6	17315.6	19767.1	1.73281	1.75045	1.77684	1.70914	1.72576	1.27433	1.48306	1.45016	1.50148	1.18528	1.739	0.0230995	5.35617e-05	1.37886	0.125997	0.000561795
PC 36:5	Phosphatidylcholine	218.913	49.821	23.4892	107.152	103.784	68.1596	78.3853	35.4684	271.934	108.467	44.7184	433.025	266.333	103.229	345.21	554.884	95.602	343.967	298.029	337.053	100.632	238.503	0.677316	0.778931	0.352457	2.70226	1.07786	2.32653	0.400842	1.44219	1.24958	1.4132	1.11777	0.825437	0.829994	1.36647	0.612491	0.421166
PC 36:4	Phosphatidylcholine	390227	324463	203719	282105	307384	105677	82035.7	84800.6	101056	79978.4	383488	333341	453530	331821	406296	137638	119239	143159	74810	40700.3	301579	381695	0.350412	0.27202	0.281188	0.335089	0.265199	0.360596	0.312393	0.375061	0.195994	0.10663	0.300782	0.0349785	0.000130388	0.270135	0.103159	1.57854e-05
PC 36:3	Phosphatidylcholine	90206.6	75216.1	25499.8	57785.1	56107.3	5411.41	3902.77	4364.28	4880.04	4686.39	55805	61073.9	71541.4	55358.8	69891.2	9350.87	7372.91	8185.61	3096.12	2036.52	60963	62734.1	0.0887655	0.0640186	0.071589	0.0800492	0.0768726	0.149056	0.117526	0.130481	0.0493531	0.0324628	0.076259	0.00827999	0.00082833	0.0957758	0.0462167	3.35482e-07
PC 36:2	Phosphatidylcholine	76869.4	66824.8	39097.6	57717.9	51923.4	19254.8	17764	16962.7	20344.1	15909.6	50317.4	71204	60718.6	59693.2	75729.3	23663.3	18781.5	22908.4	14671.2	6505.6	58486.6	63532.5	0.329218	0.303728	0.290026	0.347842	0.272022	0.37246	0.295621	0.360578	0.230924	0.102398	0.308567	0.0270986	0.000248009	0.272396	0.098942	3.00971e-05
PC 38:6	Phosphatidylcholine	3412.9	2412.03	3001.27	3640.79	2243.74	6626.46	7423.02	5157.13	7567.5	7095.99	2921.42	3703.66	3390.61	3282.93	4141.35	7319.85	5385.46	7599.17	5317.67	2903.48	2942.15	3487.99	2.25225	2.52299	1.75285	2.5721	2.41184	2.09858	1.544	2.17867	1.52456	0.832422	2.30241	0.295939	7.17502e-05	1.63565	0.484786	0.0342771
PC 38:5 (1)	Phosphatidylcholine	11035.2	8430.17	8397.98	8595.4	7556.6	6337.76	6452.53	5173.32	6249	5496.18	9148.68	10411.3	11486.6	9412.28	11690	6846.25	4906.95	7112.42	4683.27	2285.77	8803.07	10429.8	0.719949	0.732986	0.587672	0.709866	0.624348	0.656414	0.470475	0.681935	0.449029	0.219158	0.674964	0.0579487	0.00207468	0.495402	0.167214	0.000835638
PC 38:4	Phosphatidylcholine	214.068	190.497	86.0242	211.675	124.852	13.946	3.84548	14.584	16.8775	6.53289	142.153	294.768	178	246.553	273.342	49.111	33.4425	35.2864	5.62975	0	165.423	226.963	0.0843052	0.0232463	0.0881616	0.102026	0.039492	0.216383	0.147348	0.155472	0.0248047	0	0.0674463	0.0304769	0.000322613	0.108801	0.0826207	0.000160129
PC 38:3	Phosphatidylcholine	9285.16	7493.07	4301.87	8697.33	5511.87	786.731	559.804	728.016	715.684	492.111	6938.99	8231.11	8853.33	7893.14	9988.96	858.269	694.783	645.502	484.948	165.829	7057.86	8381.11	0.111469	0.0793164	0.10315	0.101402	0.0697253	0.102405	0.0828987	0.0770187	0.0578621	0.0197861	0.0930125	0.0157713	0.00014223	0.0679941	0.0279799	3.85306e-07
PC 38:2 (1)	Phosphatidylcholine	204.218	137.864	145.579	234.382	106.794	65.5178	70.2226	72.6984	55.0387	60.5388	206.41	220.796	243.562	206.525	242.984	145.559	106.889	175.119	47.1448	46.8812	165.768	224.056	0.395239	0.423621	0.438556	0.332023	0.365203	0.649655	0.477064	0.781589	0.210416	0.209239	0.390928	0.0386972	0.00263639	0.465592	0.230085	0.00221709
PE 34:2	Phosphatidylethanolamine	164.551	70.2147	799.74	123.813	380.82	91.8195	75.0078	40.9537	78.3969	93.4712	134.402	67.9431	148.905	97.7182	139.488	59.7431	57.3618	32.2298	104.367	48.4051	307.828	117.691	0.298282	0.243668	0.133041	0.254678	0.303648	0.507625	0.487391	0.27385	0.886784	0.411288	0.246663	0.0614736	0.122142	0.513388	0.203929	0.018123
PE 36:6	Phosphatidylethanolamine	10641.1	5872.45	3706.21	13447.3	3471.68	14567.6	21999.6	13418.1	20116.1	21803.4	5997.09	12908.5	6319.91	6900.8	7522.75	15189.2	15490.4	23670.9	12317.2	5564.64	7427.75	7929.8	1.96124	2.96182	1.80648	2.70823	2.93539	1.91546	1.95345	2.98506	1.55328	0.701738	2.47463	0.492792	0.00362673	1.8218	0.735651	0.0747353
PE 36:4	Phosphatidylethanolamine	1696.57	775.099	913.52	1662.92	902.978	737.502	597.47	571.874	653.726	541.192	1833.81	2207.65	2128.96	1322.59	1912.57	1052.93	914.784	893.615	516.909	350.181	1190.22	1881.12	0.619636	0.501984	0.480478	0.549249	0.4547	0.559736	0.486298	0.475045	0.274789	0.186156	0.52121	0.0581828	0.0236085	0.396405	0.141377	0.00054052
PE 36:3 (1)	Phosphatidylethanolamine	402.528	289.49	156.933	452.703	172.34	222.685	424.501	209.752	348.049	383.041	271.754	584.127	263.205	395.045	356.508	320.13	316.556	412.748	215.443	92.4723	294.799	374.128	0.75538	1.43997	0.711509	1.18063	1.29933	0.855671	0.846118	1.10323	0.575854	0.247168	1.07736	0.292895	0.764058	0.725608	0.291673	0.23395
PE 36:3 (2)	Phosphatidylethanolamine	2916.59	2201.91	595.476	2624.02	1197.5	304.027	320.793	298.528	351.371	346.61	2542.08	2446.84	2385.2	2480.59	2443.63	730.754	751.483	825.854	232.341	157.526	1907.1	2459.67	0.159419	0.16821	0.156535	0.184244	0.181747	0.297095	0.305522	0.335759	0.0944602	0.0640435	0.170031	0.0112902	0.00688757	0.219376	0.115532	9.76645e-07
PE 38:4	Phosphatidylethanolamine	3216.11	1869.33	1253.56	4365.41	1554.01	436.746	541.886	389.99	559.604	505.672	2324.21	3742.41	2037.48	2866.77	2735.41	1167.46	664.87	823.039	347.231	326.906	2451.68	2741.25	0.178141	0.221026	0.15907	0.228253	0.206255	0.425887	0.242542	0.300242	0.126669	0.119254	0.198549	0.0261609	0.009961	0.242919	0.114517	0.000236328
PE 38:3	Phosphatidylethanolamine	38756.5	35645	46831.5	31924.8	45673	73045.1	77212	75565.7	90841.6	84096.6	30187	37899.7	41792.6	29292.2	39897.5	71566.5	51633.4	67481.1	64361.8	58135.2	39766.2	35813.8	1.83687	1.94165	1.90025	2.28439	2.11478	1.9983	1.44172	1.88422	1.79712	1.62326	2.01559	0.162976	1.41507e-05	1.74892	0.196459	0.000269351
PE 38:2	Phosphatidylethanolamine	7240.01	5526.66	4694.68	5744.15	5941.13	4962.44	4318.03	3773.41	5096.65	4078.36	5455.2	5522.27	6915.55	5957.78	7814.59	5941.52	4445.39	5551.48	3666.54	2197	5829.33	6333.08	0.851289	0.740742	0.647315	0.874312	0.699629	0.938172	0.701933	0.876584	0.578951	0.346908	0.762657	0.0872687	0.0211746	0.68851	0.212875	0.0412617
PE 38:0	Phosphatidylethanolamine	1242.82	1015.71	531.689	923.02	779.231	515.188	461.629	496.714	629.06	574.376	773.248	904.893	990.947	903.896	1189.4	851.535	690.819	763.85	427.968	300.536	898.494	952.478	0.57339	0.513781	0.55283	0.700127	0.639265	0.894021	0.725286	0.801961	0.449321	0.315531	0.595879	0.0661046	0.0179227	0.637224	0.218921	0.024388
SQDG 34:5	sphingolipids	202.699	193.198	111.213	276.014	201.23	26.7765	102.73	118.021	113.288	131.372	134.133	167.601	55.2783	255.703	165.033	128.716	126.694	188.023	207.887	188.306	196.871	155.55	0.136011	0.521814	0.599485	0.575444	0.667301	0.827489	0.814493	1.20877	1.33646	1.21058	0.500011	0.187906	0.0152595	1.07956	0.216177	0.742312
SQDG 34:3	sphingolipids	710.134	687.524	587.648	565.621	669.711	733.448	702.076	701.028	816.844	772.194	728.688	707.473	854.885	744.86	779.319	970.059	883.686	838.886	732.115	773.455	644.127	763.045	1.13867	1.08996	1.08834	1.26814	1.19882	1.2713	1.1581	1.09939	0.959465	1.01364	1.15679	0.0687681	0.023275	1.10038	0.109478	0.157288
SQDG 36:5	sphingolipids	117.437	173.615	299.428	190.788	211.635	1206.21	1286.05	1470.15	1653.88	1429.3	583.961	818.326	601.493	628.494	953.36	1470.72	1653.41	1608.79	1965.02	894.592	198.581	717.127	6.07417	6.4762	7.40328	8.3285	7.19757	2.05085	2.3056	2.24338	2.74013	1.24747	7.09594	0.781295	4.81452e-07	2.11749	0.489959	0.00292798
SQDG 36:4	sphingolipids	56.1647	30.5641	23.3429	31.4538	42.3219	120.375	136.114	224	173.222	216.121	26.2233	78.4414	24.6385	65.6901	88.5508	141.28	133.121	98.5296	157.283	39.7856	36.7695	56.7088	3.27378	3.70183	6.09201	4.71103	5.87773	2.49132	2.34745	1.73747	2.77352	0.701577	4.73128	1.12698	0.000212942	2.01027	0.736852	0.0493468
SQDG 36:3	sphingolipids	0	0	18.1842	9.39154	0	60.51	63.69	90.3781	65.5624	96.1955	17.6967	56.2782	19.9741	31.6429	48.9181	93.8355	85.5821	116.236	110.053	72.1852	5.51515	34.902	10.9716	11.5482	16.3872	11.8877	17.442	2.68854	2.45207	3.33035	3.15319	2.06823	13.6473	2.70441	3.06876e-05	2.73848	0.459577	0.000601054
TAG 50:5 (1)	Triacylglyceride	82.2969	21.7463	23.1949	72.5744	15.1621	79.5693	69.6992	66.4082	89.7842	68.9205	32.498	83.3596	58.6703	45.4052	40.3838	70.1911	46.572	67.4008	79.4592	75.5492	42.9949	52.0634	1.85067	1.6211	1.54456	2.08825	1.60299	1.34819	0.894525	1.29459	1.5262	1.4511	1.74151	0.202297	0.0642208	1.30292	0.219416	0.174424
TAG 50:4 (1)	Triacylglyceride	31.1911	10.4665	13.7232	22.7252	15.2287	34.5161	40.2385	41.7853	42.8399	44.8857	19.9694	29.1486	37.272	18.0371	29.8589	39.7196	29.3853	54.0086	35.9321	41.7708	18.6669	26.8572	1.84905	2.1556	2.23847	2.29496	2.40456	1.47892	1.09413	2.01096	1.3379	1.55529	2.18853	0.188053	0.000651229	1.49544	0.301821	0.0382093
TAG 50:3	Triacylglyceride	42.998	7.21149	76.8856	42.5017	36.0454	675.196	1114.27	965.71	1229.02	1302.55	44.059	61.0562	67.6848	35.1103	67.5918	267.291	168.582	685.181	604.053	546.475	41.1284	55.1004	16.4168	27.0925	23.4804	29.8824	31.6703	4.85099	3.05954	12.4351	10.9628	9.9178	25.7085	5.40706	1.71643e-05	8.24524	3.6373	0.00408884
TAG 50:2	Triacylglyceride	31.3165	7.4066	31.2392	40.1697	35.7276	225.475	291.458	295.212	431.088	339.279	75.9445	48.3661	72.0903	42.276	74.1036	121.628	70.4398	250.093	158.845	148.449	29.1719	62.5561	7.72919	9.99104	10.1197	14.7775	11.6303	1.94431	1.12603	3.9979	2.53924	2.37305	10.8496	2.32571	3.1943e-05	2.3961	0.938506	0.0201636
TAG 52:7	Triacylglyceride	8889.89	9100.16	8576.66	9448.41	8762.7	7774.96	8645.14	7810.86	9070.6	8676.54	8114.37	8361.21	7552.48	8760.45	9564.79	8654.76	8128.16	9171.62	7800.94	7014.75	8955.56	8470.66	0.868171	0.965337	0.87218	1.01285	0.968844	1.02173	0.959566	1.08275	0.920936	0.828124	0.937475	0.0574586	0.0967961	0.962622	0.0869048	0.543176
TAG 52:6	Triacylglyceride	1429.33	413.776	2235.99	1093.67	1184.63	10381.9	11399.7	7874.89	10481.4	11787.8	1162.97	1395.08	1716.47	969.128	1497.47	4683.75	3769.74	8002.57	10173.2	9794.3	1271.48	1348.22	8.16524	8.96568	6.19349	8.24345	9.27093	3.47402	2.79608	5.93563	7.5456	7.26459	8.16776	1.07305	1.8114e-06	5.40318	1.94201	0.00196938
TAG 52:5 (1)	Triacylglyceride	2785.71	816.058	2794.63	1664.66	2257.69	7064.71	6327.49	5871.7	6844.86	6741.08	2062.41	2496.69	3674.58	1916.76	3114.85	3887.19	3360.75	6299.95	6271.54	6423.11	2063.75	2653.06	3.42324	3.06601	2.84516	3.31671	3.26642	1.46518	1.26675	2.3746	2.36389	2.42102	3.18351	0.20512	6.0196e-06	1.97829	0.504251	0.00831182
TAG 52:4	Triacylglyceride	1644.42	535.171	1005.98	825.921	1327.51	1276.81	1232.43	1284.19	1485.6	1428.72	1284.27	1334.47	2311.69	1155.32	1912.36	1185.05	893.839	1462.07	1171.45	1279.98	1067.8	1599.62	1.19574	1.15417	1.20265	1.39127	1.338	0.740833	0.558781	0.914008	0.732327	0.800176	1.25637	0.0915088	0.206654	0.749225	0.115217	0.131696
TAG 52:3	Triacylglyceride	307.576	145.189	123.685	187.959	273.061	218.024	283.116	255.06	450.109	339.549	295.505	277.074	399.467	232.169	354.948	196.778	138.849	282.999	181.026	185.358	207.494	311.833	1.05075	1.36445	1.22924	2.16926	1.63643	0.631039	0.445266	0.907535	0.580522	0.594414	1.49002	0.389754	0.0964341	0.631755	0.15156	0.0160522
TAG 52:2	Triacylglyceride	28.1967	21.6099	90.9427	0.047036	108.855	105.95	106.946	90.8937	112.833	110.1	62.4895	15.0322	114.275	17.4306	59.4307	106.831	103.305	82.8416	120.897	103.242	49.9303	53.7316	2.12196	2.14192	1.82041	2.25981	2.20507	1.98824	1.92261	1.54177	2.25001	1.92143	2.10983	0.152645	0.0324809	1.92481	0.226502	0.0318381
TAG 52:1	Triacylglyceride	15.5606	17.5351	10.8948	79.6689	103.329	9.35068	12.2658	21.4359	113.439	54.0593	34.5267	53.0613	11.079	71.1724	183.507	28.133	23.435	35.8232	40.2092	47.9117	45.3976	70.6693	0.205973	0.270186	0.47218	2.49879	1.19079	0.398093	0.331615	0.506913	0.568977	0.677971	0.927586	0.860032	0.90744	0.496714	0.122608	0.273176
TAG 54:9 (1)	Triacylglyceride	4936.07	2596.32	6698.25	3368.67	4873.56	22614.7	20595.3	11365	19554.5	17163.2	5852.83	4116.87	7681.01	3533.01	4733.65	19999.8	20399.6	16690.8	30183.9	34591.9	4494.57	5183.47	5.03155	4.58227	2.5286	4.35068	3.81864	3.85838	3.9355	3.22	5.8231	6.6735	4.06235	0.860763	0.000155838	4.7021	1.31447	0.000569191
TAG 54:8	Triacylglyceride	11625.4	4223.99	8938.95	6847.88	9619.54	19438	13460.8	9542.2	14152.3	11882.9	11591.8	10121.7	18340.5	6893.19	9369.38	18280.2	20805.9	14804.1	22483.9	24059.2	8251.15	11263.3	2.35579	1.63139	1.15647	1.71519	1.44015	1.62299	1.84723	1.31436	1.9962	2.13607	1.6598	0.39746	0.0301756	1.78337	0.289643	0.00812681
TAG 54:7 (2)	Triacylglyceride	13154.3	4559.03	6374.53	6185.87	10982.8	5691.75	3862.1	3449.64	4470.58	3808.94	12731.6	11127.4	20628.2	7950.17	11133.2	7326.4	8217.52	5512.2	6508.03	7146.1	8251.3	12714.1	0.6898	0.46806	0.418072	0.541803	0.461617	0.576242	0.646331	0.43355	0.511875	0.562061	0.51587	0.0956218	0.0440914	0.546012	0.070779	0.0289448
TAG 54:6 (2)	Triacylglyceride	8463.93	3251.5	2668.63	3230.35	7446.58	1883.26	1561.35	1379.71	1677.86	1596.72	7268.43	6892.13	13277.3	5010.12	7274.39	2149.94	2058.75	1765.32	1748.61	1884.93	5012.2	7944.48	0.375735	0.311509	0.275271	0.334755	0.318567	0.270621	0.259143	0.222207	0.220104	0.237263	0.323167	0.0327069	0.0238556	0.241868	0.020033	0.0026063
TAG 54:5 (2)	Triacylglyceride	2970.8	1426.37	631.065	1183.17	2625.52	623.043	568.572	556.008	669.636	615.757	2068.76	2685.97	3827.51	1704.65	2624.52	576.705	466.922	710.952	560.252	533.99	1767.38	2582.28	0.352522	0.321702	0.314594	0.378885	0.3484	0.223332	0.180818	0.275319	0.21696	0.20679	0.343221	0.0230991	0.0309042	0.220644	0.0309459	0.000540438
TAG 54:4	Triacylglyceride	865.531	524.609	250.456	483.168	733.292	262.812	268.796	249.457	367.577	266.735	654.363	893.421	874.851	579.726	809.607	252.028	212.037	344.048	227.592	231.683	571.411	762.394	0.459934	0.470407	0.436563	0.64328	0.4668	0.330575	0.27812	0.451273	0.298523	0.303888	0.495397	0.0748741	0.0287689	0.332476	0.0617106	5.9297e-05
TAG 54:3	Triacylglyceride	470.166	416.398	381.425	474.862	462.489	423.24	433.802	394.389	747.769	414.352	627.077	518.291	490.947	524.178	573.023	418.493	389.736	491.525	395.428	388.59	441.068	546.703	0.95958	0.983526	0.894167	1.69536	0.93943	0.765484	0.712884	0.899071	0.723295	0.710787	1.09441	0.301905	0.562987	0.762304	0.0711804	0.00299733
TAG 54:2	Triacylglyceride	38.7092	40.0565	35.3375	47.2009	39.2814	39.5091	48.611	48.9055	136.145	45.1074	105.137	54.8056	52.2233	49.0484	54.7263	46.7093	40.1647	59.3048	34.6034	41.3177	40.1171	63.1881	0.984845	1.21173	1.21907	3.39368	1.12439	0.739211	0.635637	0.938545	0.547626	0.653884	1.58674	0.907404	0.234443	0.702981	0.132577	0.136559
TAG 54:1	Triacylglyceride	31.5255	40.4172	29.4203	192.536	242.214	34.8533	73.5035	54.5686	221.16	113.143	93.994	169.618	50.2047	135.462	257.416	74.8363	96.5945	102.271	133.959	97.4367	107.223	141.339	0.325055	0.685522	0.508928	2.06262	1.05521	0.529481	0.683425	0.723588	0.947784	0.689384	0.927467	0.616685	0.893724	0.714732	0.134411	0.301551
TAG 56:9 (1/2)	Triacylglyceride	40.734	14.6597	87.6674	17.9291	36.1976	313.803	315.879	218.887	306.812	300.895	40.8516	30.8872	99.9503	27.5666	37.5022	257.359	204.05	180.51	370.601	393.82	39.4376	47.3516	7.95696	8.0096	5.55022	7.77967	7.62964	5.43507	4.30926	3.81212	7.82658	8.31694	7.38522	0.927288	3.60871e-06	5.93999	1.82489	0.000850571
TAG 56:8	Triacylglyceride	227.665	76.9496	228.452	86.5984	222.684	275.005	250.997	218.748	317.339	238.939	240.673	183.869	443.017	134.75	198.048	289.274	241.839	205.63	328.327	350.285	168.47	240.071	1.63237	1.48986	1.29844	1.88366	1.41829	1.20495	1.00736	0.856537	1.36762	1.45909	1.54453	0.2011	0.0477561	1.17911	0.222775	0.492528
TAG 56:7 (2)	Triacylglyceride	430.22	186.872	281.346	182.28	382.667	1828.24	141.628	146.869	208.051	143.379	452.974	404.479	803.299	286.205	388.242	206.543	167.567	136.912	179.387	175.214	292.677	467.04	6.2466	0.483906	0.501812	0.710854	0.489889	0.442238	0.358785	0.293149	0.384093	0.375159	1.68661	2.28158	0.56818	0.370685	0.0479022	0.0108492
TAG 56:6	Triacylglyceride	360.13	132.743	140.996	169.277	287.016	160.695	137.051	147.264	185.875	173.024	347.108	364.144	676.639	230.975	323.412	174.132	120.04	98.9818	138	253.154	218.032	388.456	0.737022	0.628582	0.675425	0.85251	0.793568	0.448268	0.309018	0.254809	0.355253	0.651694	0.737421	0.0801096	0.247183	0.403808	0.139261	0.0204006
TAG 56:5	Triacylglyceride	161.01	52.8563	32.1815	56.5917	101.561	37.0675	35.3356	33.9739	44.2234	37.5046	128.4	167.536	262.704	94.9161	136.068	52.1845	41.838	34.8779	34.328	89.1402	80.8401	157.925	0.458528	0.437104	0.420261	0.547047	0.463936	0.330438	0.264923	0.220851	0.217369	0.564447	0.465375	0.0437123	0.0980714	0.319606	0.129042	0.00766328
TAG 56:3	Triacylglyceride	9.66826	3.38952	3.61002	7.00034	3.36701	4.85527	12.0436	9.25654	21.0783	13.0921	17.6985	15.3261	10.3717	6.08683	12.9416	10.2592	8.07242	26.6848	4.10491	6.53132	5.40703	12.4849	0.897954	2.22739	1.71195	3.89832	2.42131	0.82173	0.646573	2.13736	0.328789	0.523136	2.23138	0.986166	0.0541232	0.891517	0.643328	0.770673
