# Supplementary material for: Comparative Molecular and Metabolic Profiling of Two Contrasting Wheat Cultivars under Drought Stress
Source: Int J Mol Sci. 2021 Dec 10;22(24):13287. doi: 10.3390/ijms222413287 (PMC8707805; doi:10.3390/ijms222413287)
Supplement: Supplementary file 1 [file ijms-22-13287-s001.zip › Table S2.pdf]

| Genes names and codes                                                     | Forward sequence 5' - 3'  | Reverse sequence 5' - 3'  |
|---------------------------------------------------------------------------|---------------------------|---------------------------|
| <i>TaActin AB181991.1</i>                                                 | CTTGTATGCCAGCGGTCGAACA    | CTCATAATCAAGGGCCACGTA     |
| <i>TaPEPKR2-L</i><br><i>TraesCS5B02G243700</i>                            | ATGGAGTCGCTGCCGCGGAAG     | ATTGGGGTCATGTCAGAACGCC    |
| <i>TraesCS5A02G411700</i><br><i>JUB1 orthologue from AT</i>               | GACACCATGCACAACCAACATTTTC | TTGCGGTTTCTGCTCCGGTATC    |
| <i>TraesCS5D02G148800.1 (NAC29) 5D</i><br><i>ATAF1 orthologue from AT</i> | ATCCTCCATGAGGCTGGATGAC    | AGCTCTCCTGCTCATGCTCTTG    |
| <i>TaD27</i><br><i>TRIAECS427BLTGACv1_577741_AA1882380</i>                | ATGGAGGCCACCGCACTTGTGC    | CTAGCAATTCACACCATAGTCCT   |
| <i>TaP5CS</i><br><br><i>Traes3DL3E215D878.2</i>                           | TAAATGCCGTTGTTGCTGCC      | AGCAAAACTAACAAATGGCTACCAG |
| <i>TaDREB2</i><br><i>TraesCS5A01G310100.1</i>                             | GCGTACAACACCTTGATTTCC     | AAACTCAACTCACATCTAAGC     |
| <i>TaNAC55A</i><br><i>TraesCS3A02G250800.1</i>                            | GCCCTTGAAAGCCGTAATTGCC    | TGCTGTACTGCTGCTGCTTG      |
| <i>TaNAC55B</i><br><i>TraesCS2B02G075900</i>                              | CACGAGTTCAGGTTCCCTTCAC    | CTTGTCGATCGGCCTACTCTTG    |
| <i>TaNAC55D</i><br><i>TraesCS2D02G061500</i>                              | AAACACAGCCGCCATCACAGAG    | ACTGCGCGTCAAAGAAGATCGG    |
| <i>TaNAC7A</i><br><i>TraesCS5A02G411700.1 5A</i>                          | GACACCATGCACAACCAACATTTTC | TTGCGGTTTCTGCTCCGGTATC    |
| <i>TaNAC7B</i><br><i>TraesCS5B02G415600</i>                               | AGTCAGATGGACGCAGTGAACG    | AACGGCTGGTTGTGCATGGTATC   |
| <i>TaNAC7D</i><br><i>TraesCS5D02G420800</i>                               | CACCATGCACAACCAGCAGTTTC   | TTGTGGTTTCTGCTCCGGCATC    |

Table S2 List of qPCR Primers used in this study
