# Supplementary material for: Comparative Molecular and Metabolic Profiling of Two Contrasting Wheat Cultivars under Drought Stress
Source: Int J Mol Sci. 2021 Dec 10;22(24):13287. doi: 10.3390/ijms222413287 (PMC8707805; doi:10.3390/ijms222413287)
Supplement: Supplementary file 1 [file ijms-22-13287-s001.zip › Table S3.xlsx]

## Sheet: Sheet0
Row	Adenine	Adenosine-5-monophosphate	Alanine	b-alanine	Arginine	Ascorbic acid	Asparagine	Aspartic acid	"3, 4-dihydroxy benzoic acid"	Benzoic acid	Benzylalcohol	Citric acid	Dehydroascorbic acid	Dehydroascorpic acid dimer	Erythritol	Erythrose	Fructose	F6F	Fucose	Fumaric acid	Gaba	Galactoinol	Galactonic acid	Galacturonic acid	G-1-P	Glucose	G6P	Glucuronic acid lacton	Glutamic acid	Glutamine	2oxo- glutaric acid	Glyceric acid	Glycerol	G-2-P	G-3-P	Glycine	Glycolic acid	Histidine	Homoserine	myo- insitol	Isolucine	Lactic acid	Leucine	Lysine	2-methyl-malic acid	Malic acid	Maltose	Methionine	Nicotinic acid
Adenine	1	-0.398237	0.578405	-0.459684	0.0239912	-0.49034	-0.319207	0.531171	-0.0533549	0.304045	-0.0780848	-0.650609	-0.0341339	-0.113984	-0.320091	-0.249502	-0.262462	0.169381	-0.0346742	-0.571748	0.347025	0.376366	-0.309057	-0.674401	-0.57068	-0.357126	-0.187634	-0.374053	-0.375803	-0.743572	0.182098	0.0895059	0.402251	-0.579486	-0.5131	-0.474728	-0.531531	-0.351672	0.561133	0.749496	-0.482622	0.0960634	-0.478648	-0.452652	-0.477498	-0.819603	-0.124268	0.444942	0.206515
Adenosine-5-monophosphate	-0.398237	1	-0.149457	0.24838	0.389684	0.705596	0.38788	0.157363	0.667553	-0.0335339	0.0573185	0.475274	0.642671	0.708033	0.258583	0.245165	-0.244221	0.563654	0.597165	0.458039	-0.465705	0.0202263	0.547506	0.421348	0.425601	0.11171	0.520152	0.425561	0.598146	0.480607	0.406925	0.425585	-0.291617	0.333805	0.448577	0.319839	0.224719	0.294253	-0.108748	-0.0209988	0.152285	-0.310207	0.169936	0.425291	0.43336	0.462026	0.158778	0.0300006	0.393081
Alanine	0.578405	-0.149457	1	-0.219163	0.382826	-0.191886	0.196572	0.683557	-0.129136	0.138666	-0.0870469	-0.238361	0.394981	0.327959	-0.169716	-0.144097	-0.252015	0.121799	-0.0555096	-0.384192	0.254863	0.0564685	-0.0207578	-0.211391	-0.269171	-0.219658	-0.131605	-0.49767	0.185922	-0.482783	0.206687	-0.00285339	0.116309	-0.110011	-0.198676	-0.0595837	-0.373612	-0.00702333	0.61551	0.515796	-0.231566	-0.0188372	-0.245205	-0.191746	-0.393661	-0.536745	0.326138	0.583845	-0.0834655
b-alanine	-0.459684	0.24838	-0.219163	1	0.517544	0.503504	0.470782	-0.448239	-0.0192943	-0.151864	-0.218091	0.638363	0.24964	0.360911	0.433837	0.428183	0.455642	-0.0837364	0.557476	0.228316	-0.0726731	-0.29952	0.780109	0.785318	0.69565	0.598976	0.328385	0.367757	0.470184	0.54201	0.229948	0.193672	-0.178957	0.343812	0.58051	0.70227	0.597217	0.688305	-0.388653	-0.429263	0.625053	-0.127229	0.641228	0.789838	0.173201	0.522648	0.243853	-0.116946	0.0778846
Arginine	0.0239912	0.389684	0.382826	0.517544	1	0.432917	0.613556	0.202262	0.0618328	0.0210046	-0.244233	0.288872	0.557071	0.69168	0.141232	0.167004	-0.0309738	0.177631	0.471818	-0.265681	0.309768	-0.156785	0.513557	0.510794	0.181602	0.120464	0.0827363	-0.0639371	0.542232	-0.0239621	0.24406	0.273869	-0.30618	0.168922	0.138071	0.406242	0.0247687	0.670044	0.180417	0.0899367	0.283304	-0.341246	0.291438	0.578197	-0.297563	-0.0599961	0.320789	0.528215	0.00667399
Ascorbic acid	-0.49034	0.705596	-0.191886	0.503504	0.432917	1	0.673191	0.0109515	0.341789	-0.0249904	0.0565982	0.45949	0.579846	0.619829	0.38818	0.35566	-0.0668459	0.136988	0.501689	0.280747	-0.235466	-0.345555	0.593045	0.73813	0.414592	0.123475	0.114753	0.407819	0.689519	0.421901	0.221686	0.419066	-0.251586	0.353307	0.616253	0.535584	0.399385	0.530037	-0.132819	-0.267955	0.298311	-0.340618	0.355818	0.600853	0.182153	0.366018	0.228708	-0.0045265	0.062691
Asparagine	-0.319207	0.38788	0.196572	0.470782	0.613556	0.673191	1	0.0405571	-0.0863106	-0.159941	0.207809	0.485376	0.376468	0.466269	0.460697	0.429582	0.256828	-0.280748	0.231645	0.0183966	0.106919	-0.636876	0.446812	0.771129	0.436321	0.195438	-0.199836	-0.0703402	0.828897	0.298774	-0.105679	0.400567	-0.0829082	0.419536	0.576765	0.696877	0.399803	0.735166	-0.176656	-0.344671	0.587192	-0.594334	0.643154	0.721156	-0.195219	0.219591	0.491071	0.261215	-0.0492997
Aspartic acid	0.531171	0.157363	0.683557	-0.448239	0.202262	0.0109515	0.0405571	1	0.203204	0.0451846	0.0360275	-0.493948	0.596009	0.470254	-0.362053	-0.340147	-0.600702	0.477068	0.0111765	-0.177997	0.0112421	0.173247	-0.258374	-0.342988	-0.493136	-0.562462	-0.143739	-0.35338	0.231293	-0.560074	0.304611	0.141842	-0.0303661	-0.0420047	-0.332493	-0.3585	-0.469556	-0.373346	0.752023	0.55616	-0.627355	0.0727457	-0.59541	-0.439355	-0.127976	-0.560711	0.0706314	0.321607	0.108933
"3, 4-dihydroxy benzoic acid"	-0.0533549	0.667553	-0.129136	-0.0192943	0.0618328	0.341789	-0.0863106	0.203204	1	0.0145926	-0.13236	0.109744	0.462507	0.423293	0.24761	0.248196	-0.408609	0.501208	0.508896	0.496372	-0.51377	0.400347	0.283362	-0.0435035	0.158997	-0.122814	0.533465	0.352258	0.152528	0.331969	0.296993	0.369221	0.121531	-0.136827	0.177677	-0.107977	0.0629115	-0.21022	0.0358076	0.214445	-0.240954	-0.0715373	-0.231209	-0.0478214	0.605458	0.312418	-0.00919032	0.00368333	0.543584
Benzoic acid	0.304045	-0.0335339	0.138666	-0.151864	0.0210046	-0.0249904	-0.159941	0.0451846	0.0145926	1	-0.47684	-0.189013	0.00582767	0.0460859	-0.254976	-0.219632	-0.27886	0.149251	0.0189898	-0.245701	0.350517	0.352404	0.0390979	-0.288249	-0.141901	-0.274902	0.0192507	0.0436482	-0.248276	-0.263708	0.281288	-0.17758	0.149989	-0.139957	-0.226094	-0.260013	-0.218426	-0.0719941	0.215179	0.497816	-0.225708	0.375609	-0.296208	-0.20176	-0.165968	-0.333789	-0.254705	0.347664	-0.0271529
Benzylalcohol	-0.0780848	0.0573185	-0.0870469	-0.218091	-0.244233	0.0565982	0.207809	0.0360275	-0.13236	-0.47684	1	0.215734	-0.253828	-0.276873	0.264644	0.235865	0.292296	-0.173907	-0.204257	0.0641239	-0.303113	-0.528049	-0.188677	0.0701968	0.0346751	0.135179	-0.277049	-0.412166	0.24201	0.175077	-0.371635	0.335083	0.26002	0.0985489	0.325481	0.275898	0.155684	0.0692285	-0.216618	-0.36565	0.276264	-0.517707	0.317647	0.0681214	-0.145897	0.0782276	0.0933919	-0.155893	0.127565
Citric acid	-0.650609	0.475274	-0.238361	0.638363	0.288872	0.45949	0.485376	-0.493948	0.109744	-0.189013	0.215734	1	0.0555761	0.166333	0.548715	0.506706	0.487281	-0.0592134	0.32834	0.421658	-0.257283	-0.352849	0.684782	0.72902	0.66969	0.711151	0.427232	0.129668	0.473542	0.833406	0.0749552	0.0759114	-0.082445	0.379465	0.719474	0.746161	0.440056	0.673997	-0.467686	-0.490767	0.788463	-0.45704	0.753105	0.748429	0.231975	0.781387	0.372498	0.0566471	-0.0116688
Dehydroascorbic acid	-0.0341339	0.642671	0.394981	0.24964	0.557071	0.579846	0.376468	0.596009	0.462507	0.00582767	-0.253828	0.0555761	1	0.94795	0.0296437	0.0353485	-0.491409	0.515532	0.508892	0.19274	-0.296059	0.047352	0.441217	0.280475	0.153121	-0.164865	0.269623	0.225284	0.606532	-0.0222138	0.506298	0.328801	-0.341955	0.232352	0.178486	0.159833	0.0751994	0.144928	0.377147	0.236493	-0.209647	0.0153469	-0.174132	0.152385	0.252141	0.00357562	0.265864	0.160128	0.166283
Dehydroascorpic acid dimer	-0.113984	0.708033	0.327959	0.360911	0.69168	0.619829	0.466269	0.470254	0.423293	0.0460859	-0.276873	0.166333	0.94795	1	0.110572	0.123522	-0.37216	0.493777	0.608713	0.0796096	-0.165181	-0.0221835	0.537174	0.387975	0.257972	-0.09606	0.281459	0.253183	0.668198	0.0296327	0.523639	0.386105	-0.443341	0.247993	0.183006	0.285556	0.0803937	0.331514	0.250162	0.188444	-0.058882	-0.0655218	-0.0341502	0.314876	0.144002	0.0438763	0.36697	0.185317	0.168445
Erythritol	-0.320091	0.258583	-0.169716	0.433837	0.141232	0.38818	0.460697	-0.362053	0.24761	-0.254976	0.264644	0.548715	0.0296437	0.110572	1	0.993218	0.618472	-0.368534	0.52153	0.238372	-0.33999	-0.604625	0.589453	0.59346	0.702379	0.61306	-0.0468173	0.0247825	0.495718	0.628555	-0.0692887	0.680944	0.246649	0.0114037	0.724271	0.784923	0.560078	0.530448	-0.698541	-0.558282	0.702913	-0.691748	0.705785	0.558571	0.0496852	0.513291	0.357742	-0.21666	0.117331
Erythrose	-0.249502	0.245165	-0.144097	0.428183	0.167004	0.35566	0.429582	-0.340147	0.248196	-0.219632	0.235865	0.506706	0.0353485	0.123522	0.993218	1	0.607715	-0.336733	0.556202	0.188737	-0.308508	-0.566045	0.593665	0.556629	0.69587	0.609764	-0.0348227	0.0288034	0.46965	0.578854	-0.0239893	0.713646	0.254874	-0.0260613	0.690549	0.768485	0.541768	0.538369	-0.685022	-0.506438	0.688729	-0.68678	0.689432	0.552761	0.0109064	0.456874	0.338286	-0.197589	0.158409
Fructose	-0.262462	-0.244221	-0.252015	0.455642	-0.0309738	-0.0668459	0.256828	-0.600702	-0.408609	-0.27886	0.292296	0.487281	-0.491409	-0.37216	0.618472	0.607715	1	-0.511661	0.192761	-0.0433272	-0.0247105	-0.624906	0.308689	0.46993	0.512798	0.798804	-0.178794	-0.164418	0.143474	0.44595	-0.205913	0.22309	0.115392	0.0541008	0.46569	0.694685	0.360558	0.499277	-0.715959	-0.61203	0.798682	-0.489741	0.777431	0.524879	-0.253933	0.377355	0.177337	-0.246854	-0.174714
F6F	0.169381	0.563654	0.121799	-0.0837364	0.177631	0.136988	-0.280748	0.477068	0.501208	0.149251	-0.173907	-0.0592134	0.515532	0.493777	-0.368534	-0.336733	-0.511661	1	0.439371	0.172828	-0.304566	0.564005	0.203305	-0.187237	-0.131609	-0.134125	0.624349	0.28964	0.0444551	-0.0619472	0.765179	0.0161262	-0.259801	0.113919	-0.100898	-0.23971	-0.324263	-0.207268	0.414399	0.550877	-0.405744	0.201186	-0.412992	-0.101115	0.270056	-0.0371654	-0.0553563	0.180822	0.372389
Fucose	-0.0346742	0.597165	-0.0555096	0.557476	0.471818	0.501689	0.231645	0.0111765	0.508896	0.0189898	-0.204257	0.32834	0.508892	0.608713	0.52153	0.556202	0.192761	0.439371	1	0.12028	-0.328752	-0.0477765	0.805119	0.428369	0.51555	0.452056	0.424856	0.405155	0.433697	0.335337	0.647479	0.642668	-0.135005	-0.0310049	0.437242	0.513422	0.214048	0.410504	-0.240928	0.0482253	0.272484	-0.324707	0.281809	0.521492	0.12595	0.267747	0.221133	-0.0357444	0.36368
Fumaric acid	-0.571748	0.458039	-0.384192	0.228316	-0.265681	0.280747	0.0183966	-0.177997	0.496372	-0.245701	0.0641239	0.421658	0.19274	0.0796096	0.238372	0.188737	-0.0433272	0.172828	0.12028	1	-0.729002	0.0631825	0.297608	0.278386	0.510957	0.216495	0.515433	0.390016	0.290593	0.766246	0.0983688	0.0110483	0.194339	0.552687	0.58013	0.144703	0.591523	-0.155328	-0.343158	-0.384764	0.145896	0.052756	0.165427	0.124069	0.913651	0.80794	-0.0795244	-0.406664	0.351647
Gaba	0.347025	-0.465705	0.254863	-0.0726731	0.309768	-0.235466	0.106919	0.0112421	-0.51377	0.350517	-0.303113	-0.257283	-0.296059	-0.165181	-0.33999	-0.308508	-0.0247105	-0.304566	-0.328752	-0.729002	1	0.0685572	-0.279268	-0.126075	-0.441195	-0.308179	-0.384449	-0.300621	-0.236326	-0.530035	-0.135553	-0.356539	-0.0502644	-0.216826	-0.530411	-0.232019	-0.452872	0.176205	0.333569	0.288327	-0.05209	0.0792741	-0.071836	-0.00634861	-0.676015	-0.542107	0.0939209	0.51022	-0.333049
Galactoinol	0.376366	0.0202263	0.0564685	-0.29952	-0.156785	-0.345555	-0.636876	0.173247	0.400347	0.352404	-0.528049	-0.352849	0.047352	-0.0221835	-0.604625	-0.566045	-0.624906	0.564005	-0.0477765	0.0631825	0.0685572	1	-0.193842	-0.634723	-0.376045	-0.36884	0.603025	0.360221	-0.601637	-0.269594	0.361062	-0.43125	0.019812	-0.308715	-0.514098	-0.737528	-0.427119	-0.522437	0.489547	0.730537	-0.623183	0.582079	-0.650271	-0.440026	0.326063	-0.205467	-0.323677	0.240046	0.328971
Galactonic acid	-0.309057	0.547506	-0.0207578	0.780109	0.513557	0.593045	0.446812	-0.258374	0.283362	0.0390979	-0.188677	0.684782	0.441217	0.537174	0.589453	0.593665	0.308689	0.203305	0.805119	0.297608	-0.279268	-0.193842	1	0.694649	0.732745	0.636965	0.498996	0.415599	0.554647	0.610083	0.561449	0.386694	-0.0484794	0.268084	0.71445	0.742759	0.465559	0.660476	-0.346955	-0.162292	0.584278	-0.325753	0.579131	0.756277	0.198879	0.534019	0.388853	0.0528763	0.194983
Galacturonic acid	-0.674401	0.421348	-0.211391	0.785318	0.510794	0.73813	0.771129	-0.342988	-0.0435035	-0.288249	0.0701968	0.72902	0.280475	0.387975	0.59346	0.556629	0.46993	-0.187237	0.428369	0.278386	-0.126075	-0.634723	0.694649	1	0.670008	0.562185	0.0452778	0.213137	0.737207	0.644196	0.0629088	0.294226	-0.252171	0.552472	0.762993	0.86189	0.582881	0.809748	-0.476262	-0.64374	0.764978	-0.511758	0.794304	0.876783	0.0534076	0.613425	0.410243	-0.0587212	-0.146001
G-1-P	-0.57068	0.425601	-0.269171	0.69565	0.181602	0.414592	0.436321	-0.493136	0.158997	-0.141901	0.0346751	0.66969	0.153121	0.257972	0.702379	0.69587	0.512798	-0.131609	0.51555	0.510957	-0.441195	-0.376045	0.732745	0.670008	1	0.659575	0.364209	0.413238	0.557583	0.77971	0.122404	0.459173	0.0329854	0.432028	0.800338	0.776391	0.838104	0.567008	-0.769102	-0.582323	0.737177	-0.284656	0.737126	0.688828	0.388378	0.715603	0.175377	-0.385136	0.343028
Glucose	-0.357126	0.11171	-0.219658	0.598976	0.120464	0.123475	0.195438	-0.562462	-0.122814	-0.274902	0.135179	0.711151	-0.164865	-0.09606	0.61306	0.609764	0.798804	-0.134125	0.452056	0.216495	-0.308179	-0.36884	0.636965	0.562185	0.659575	1	0.290401	0.134581	0.186761	0.636282	0.136398	0.200833	-0.0474056	0.114012	0.627828	0.745526	0.401176	0.580542	-0.627671	-0.492386	0.795605	-0.479703	0.754943	0.647962	0.0293315	0.586088	0.124053	-0.180191	-0.0694133
G6P	-0.187634	0.520152	-0.131605	0.328385	0.0827363	0.114753	-0.199836	-0.143739	0.533465	0.0192507	-0.277049	0.427232	0.269623	0.281459	-0.0468173	-0.0348227	-0.178794	0.624349	0.424856	0.515433	-0.384449	0.603025	0.498996	0.0452778	0.364209	0.290401	1	0.59749	-0.0217043	0.462521	0.5702	-0.122856	-0.0957142	0.124289	0.221624	0.0156176	0.119459	0.0343642	-0.00584781	0.243394	0.0390566	0.195495	0.0147241	0.232113	0.622123	0.48691	0.0285017	0.0376498	0.489797
Glucuronic acid lacton	-0.374053	0.425561	-0.49767	0.367757	-0.0639371	0.407819	-0.0703402	-0.35338	0.352258	0.0436482	-0.412166	0.129668	0.225284	0.253183	0.0247825	0.0288034	-0.164418	0.28964	0.405155	0.390016	-0.300621	0.360221	0.415599	0.213137	0.413238	0.134581	0.59749	1	-0.0310277	0.332335	0.373024	0.0436984	-0.302032	0.110511	0.236727	0.0457967	0.347735	0.0978088	-0.269587	0.00169683	0.0237241	0.244742	0.0629597	0.302617	0.531247	0.392122	-0.10062	-0.349375	0.313802
Glutamic acid	-0.375803	0.598146	0.185922	0.470184	0.542232	0.689519	0.828897	0.231293	0.152528	-0.248276	0.24201	0.473542	0.606532	0.668198	0.495718	0.46965	0.143474	0.0444551	0.433697	0.290593	-0.236326	-0.601637	0.554647	0.737207	0.557583	0.186761	-0.0217043	-0.0310277	1	0.420069	0.180521	0.54788	-0.0809299	0.597231	0.655124	0.696706	0.483781	0.531941	-0.197722	-0.380528	0.449647	-0.476642	0.499571	0.588117	0.0957327	0.35505	0.487814	0.00206167	0.17198
Glutamine	-0.743572	0.480607	-0.482783	0.54201	-0.0239621	0.421901	0.298774	-0.560074	0.331969	-0.263708	0.175077	0.833406	-0.0222138	0.0296327	0.628555	0.578854	0.44595	-0.0619472	0.335337	0.766246	-0.530035	-0.269594	0.610083	0.644196	0.77971	0.636282	0.462521	0.332335	0.420069	1	0.0430349	0.162815	0.125214	0.480569	0.812716	0.61634	0.659551	0.373301	-0.684339	-0.623312	0.671376	-0.345867	0.662345	0.585671	0.586593	0.968033	0.180417	-0.297118	0.200992
2oxo- glutaric acid	0.182098	0.406925	0.206687	0.229948	0.24406	0.221686	-0.105679	0.304611	0.296993	0.281288	-0.371635	0.0749552	0.506298	0.523639	-0.0692887	-0.0239893	-0.205913	0.765179	0.647479	0.0983688	-0.135553	0.361062	0.561449	0.0629088	0.122404	0.136398	0.5702	0.373024	0.180521	0.0430349	1	0.079847	-0.134263	0.136296	0.116953	0.080565	-0.166036	0.058718	0.245271	0.478237	-0.124946	0.131651	-0.137859	0.152866	0.132108	0.0278352	0.231584	0.16206	0.247228
Glyceric acid	0.0895059	0.425585	-0.00285339	0.193672	0.273869	0.419066	0.400567	0.141842	0.369221	-0.17758	0.335083	0.0759114	0.328801	0.386105	0.680944	0.713646	0.22309	0.0161262	0.642668	0.0110483	-0.356539	-0.43125	0.386694	0.294226	0.459173	0.200833	-0.122856	0.0436984	0.54788	0.162815	0.079847	1	0.169997	-0.0910159	0.45689	0.500623	0.409264	0.316206	-0.388154	-0.200606	0.286837	-0.576135	0.340162	0.34246	-0.0667225	0.0275524	0.107755	-0.201788	0.495741
Glycerol	0.402251	-0.291617	0.116309	-0.178957	-0.30618	-0.251586	-0.0829082	-0.0303661	0.121531	0.149989	0.26002	-0.082445	-0.341955	-0.443341	0.246649	0.254874	0.115392	-0.259801	-0.135005	0.194339	-0.0502644	0.019812	-0.0484794	-0.252171	0.0329854	-0.0474056	-0.0957142	-0.302032	-0.0809299	0.125214	-0.134263	0.169997	1	-0.0942875	0.235	-0.0738482	0.231946	-0.247912	-0.102589	0.0625345	0.0551084	-0.109616	0.0711333	-0.163767	0.0712972	-0.0242606	-0.0693443	0.0969296	0.422504
G-2-P	-0.579486	0.333805	-0.110011	0.343812	0.168922	0.353307	0.419536	-0.0420047	-0.136827	-0.139957	0.0985489	0.379465	0.232352	0.247993	0.0114037	-0.0260613	0.0541008	0.113919	-0.0310049	0.552687	-0.216826	-0.308715	0.268084	0.552472	0.432028	0.114012	0.124289	0.110511	0.597231	0.480569	0.136296	-0.0910159	-0.0942875	1	0.50953	0.361556	0.510749	0.256137	-0.231707	-0.432583	0.340299	-0.0158373	0.371596	0.381927	0.338685	0.519687	0.157106	-0.143317	0.0253695
G-3-P	-0.5131	0.448577	-0.198676	0.58051	0.138071	0.616253	0.576765	-0.332493	0.177677	-0.226094	0.325481	0.719474	0.178486	0.183006	0.724271	0.690549	0.46569	-0.100898	0.437242	0.58013	-0.530411	-0.514098	0.71445	0.762993	0.800338	0.627828	0.221624	0.236727	0.655124	0.812716	0.116953	0.45689	0.235	0.50953	1	0.819128	0.764974	0.561125	-0.59751	-0.565552	0.736619	-0.521736	0.769104	0.712313	0.302735	0.702682	0.272023	-0.172864	0.225689
Glycine	-0.474728	0.319839	-0.0595837	0.70227	0.406242	0.535584	0.696877	-0.3585	-0.107977	-0.260013	0.275898	0.746161	0.159833	0.285556	0.784923	0.768485	0.694685	-0.23971	0.513422	0.144703	-0.232019	-0.737528	0.742759	0.86189	0.776391	0.745526	0.0156176	0.0457967	0.696706	0.61634	0.080565	0.500623	-0.0738482	0.361556	0.819128	1	0.586618	0.835646	-0.606919	-0.599931	0.87935	-0.634373	0.885419	0.838806	-0.104997	0.519121	0.473371	-0.0908417	-0.049709
Glycolic acid	-0.531531	0.224719	-0.373612	0.597217	0.0247687	0.399385	0.399803	-0.469556	0.0629115	-0.218426	0.155684	0.440056	0.0751994	0.0803937	0.560078	0.541768	0.360558	-0.324263	0.214048	0.591523	-0.452872	-0.427119	0.465559	0.582881	0.838104	0.401176	0.119459	0.347735	0.483781	0.659551	-0.166036	0.409264	0.231946	0.510749	0.764974	0.586618	1	0.375852	-0.703388	-0.689969	0.583143	-0.147543	0.62948	0.51777	0.456029	0.609598	-0.0394069	-0.498265	0.363978
Histidine	-0.351672	0.294253	-0.00702333	0.688305	0.670044	0.530037	0.735166	-0.373346	-0.21022	-0.0719941	0.0692285	0.673997	0.144928	0.331514	0.530448	0.538369	0.499277	-0.207268	0.410504	-0.155328	0.176205	-0.522437	0.660476	0.809748	0.567008	0.580542	0.0343642	0.0978088	0.531941	0.373301	0.058718	0.316206	-0.247912	0.256137	0.561125	0.835646	0.375852	1	-0.390449	-0.362093	0.827419	-0.594	0.827786	0.917294	-0.344518	0.290653	0.434644	0.257515	-0.127958
Homoserine	0.561133	-0.108748	0.61551	-0.388653	0.180417	-0.132819	-0.176656	0.752023	0.0358076	0.215179	-0.216618	-0.467686	0.377147	0.250162	-0.698541	-0.685022	-0.715959	0.414399	-0.240928	-0.343158	0.333569	0.489547	-0.346955	-0.476262	-0.769102	-0.627671	-0.00584781	-0.269587	-0.197722	-0.684339	0.245271	-0.388154	-0.102589	-0.231707	-0.59751	-0.606919	-0.703388	-0.390449	1	0.756313	-0.734703	0.378343	-0.728014	-0.496463	-0.191843	-0.6409	0.0193837	0.56802	-0.13965
myo- insitol	0.749496	-0.0209988	0.515796	-0.429263	0.0899367	-0.267955	-0.344671	0.55616	0.214445	0.497816	-0.36565	-0.490767	0.236493	0.188444	-0.558282	-0.506438	-0.61203	0.550877	0.0482253	-0.384764	0.288327	0.730537	-0.162292	-0.64374	-0.582323	-0.492386	0.243394	0.00169683	-0.380528	-0.623312	0.478237	-0.200606	0.0625345	-0.432583	-0.565552	-0.599931	-0.689969	-0.362093	0.756313	1	-0.646262	0.334463	-0.657232	-0.418805	-0.193588	-0.62875	0.00822276	0.59523	0.16642
Isolucine	-0.482622	0.152285	-0.231566	0.625053	0.283304	0.298311	0.587192	-0.627355	-0.240954	-0.225708	0.276264	0.788463	-0.209647	-0.058882	0.702913	0.688729	0.798682	-0.405744	0.272484	0.145896	-0.05209	-0.623183	0.584278	0.764978	0.737177	0.795605	0.0390566	0.0237241	0.449647	0.671376	-0.124946	0.286837	0.0551084	0.340299	0.736619	0.87935	0.583143	0.827419	-0.734703	-0.646262	1	-0.648373	0.987983	0.853903	-0.128369	0.581364	0.334869	-0.0243561	-0.0411661
Lactic acid	0.0960634	-0.310207	-0.0188372	-0.127229	-0.341246	-0.340618	-0.594334	0.0727457	-0.0715373	0.375609	-0.517707	-0.45704	0.0153469	-0.0655218	-0.691748	-0.68678	-0.489741	0.201186	-0.324707	0.052756	0.0792741	0.582079	-0.325753	-0.511758	-0.284656	-0.479703	0.195495	0.244742	-0.476642	-0.345867	0.131651	-0.576135	-0.109616	-0.0158373	-0.521736	-0.634373	-0.147543	-0.594	0.378343	0.334463	-0.648373	1	-0.670663	-0.587599	0.333822	-0.232809	-0.372606	-0.220866	0.00379628
Leucine	-0.478648	0.169936	-0.245205	0.641228	0.291438	0.355818	0.643154	-0.59541	-0.231209	-0.296208	0.317647	0.753105	-0.174132	-0.0341502	0.705785	0.689432	0.777431	-0.412992	0.281809	0.165427	-0.071836	-0.650271	0.579131	0.794304	0.737126	0.754943	0.0147241	0.0629597	0.499571	0.662345	-0.137859	0.340162	0.0711333	0.371596	0.769104	0.885419	0.62948	0.827786	-0.728014	-0.657232	0.987983	-0.670663	1	0.881813	-0.113771	0.573052	0.356194	-0.0488025	0.00756937
Lysine	-0.452652	0.425291	-0.191746	0.789838	0.578197	0.600853	0.721156	-0.439355	-0.0478214	-0.20176	0.0681214	0.748429	0.152385	0.314876	0.558571	0.552761	0.524879	-0.101115	0.521492	0.124069	-0.00634861	-0.440026	0.756277	0.876783	0.688828	0.647962	0.232113	0.302617	0.588117	0.585671	0.152866	0.34246	-0.163767	0.381927	0.712313	0.838806	0.51777	0.917294	-0.496463	-0.418805	0.853903	-0.587599	0.881813	1	-0.0753452	0.516537	0.41739	0.128212	0.0815749
2-methyl-malic acid	-0.477498	0.43336	-0.393661	0.173201	-0.297563	0.182153	-0.195219	-0.127976	0.605458	-0.165968	-0.145897	0.231975	0.252141	0.144002	0.0496852	0.0109064	-0.253933	0.270056	0.12595	0.913651	-0.676015	0.326063	0.198879	0.0534076	0.388378	0.0293315	0.622123	0.531247	0.0957327	0.586593	0.132108	-0.0667225	0.0712972	0.338685	0.302735	-0.104997	0.456029	-0.344518	-0.191843	-0.193588	-0.128369	0.333822	-0.113771	-0.0753452	1	0.668252	-0.19631	-0.470897	0.421206
Malic acid	-0.819603	0.462026	-0.536745	0.522648	-0.0599961	0.366018	0.219591	-0.560711	0.312418	-0.333789	0.0782276	0.781387	0.00357562	0.0438763	0.513291	0.456874	0.377355	-0.0371654	0.267747	0.80794	-0.542107	-0.205467	0.534019	0.613425	0.715603	0.586088	0.48691	0.392122	0.35505	0.968033	0.0278352	0.0275524	-0.0242606	0.519687	0.702682	0.519121	0.609598	0.290653	-0.6409	-0.62875	0.581364	-0.232809	0.573052	0.516537	0.668252	1	0.168908	-0.359416	0.104232
Maltose	-0.124268	0.158778	0.326138	0.243853	0.320789	0.228708	0.491071	0.0706314	-0.00919032	-0.254705	0.0933919	0.372498	0.265864	0.36697	0.357742	0.338286	0.177337	-0.0553563	0.221133	-0.0795244	0.0939209	-0.323677	0.388853	0.410243	0.175377	0.124053	0.0285017	-0.10062	0.487814	0.180417	0.231584	0.107755	-0.0693443	0.157106	0.272023	0.473371	-0.0394069	0.434644	0.0193837	0.00822276	0.334869	-0.372606	0.356194	0.41739	-0.19631	0.168908	1	0.334636	-0.15383
Methionine	0.444942	0.0300006	0.583845	-0.116946	0.528215	-0.0045265	0.261215	0.321607	0.00368333	0.347664	-0.155893	0.0566471	0.160128	0.185317	-0.21666	-0.197589	-0.246854	0.180822	-0.0357444	-0.406664	0.51022	0.240046	0.0528763	-0.0587212	-0.385136	-0.180191	0.0376498	-0.349375	0.00206167	-0.297118	0.16206	-0.201788	0.0969296	-0.143317	-0.172864	-0.0908417	-0.498265	0.257515	0.56802	0.59523	-0.0243561	-0.220866	-0.0488025	0.128212	-0.470897	-0.359416	0.334636	1	-0.133547
Nicotinic acid	0.206515	0.393081	-0.0834655	0.0778846	0.00667399	0.062691	-0.0492997	0.108933	0.543584	-0.0271529	0.127565	-0.0116688	0.166283	0.168445	0.117331	0.158409	-0.174714	0.372389	0.36368	0.351647	-0.333049	0.328971	0.194983	-0.146001	0.343028	-0.0694133	0.489797	0.313802	0.17198	0.200992	0.247228	0.495741	0.422504	0.0253695	0.225689	-0.049709	0.363978	-0.127958	-0.13965	0.16642	-0.0411661	0.00379628	0.00756937	0.0815749	0.421206	0.104232	-0.15383	-0.133547	1
Ornithine	-0.240748	0.42394	0.1938	0.729489	0.809885	0.5459	0.581227	-0.021353	0.0248058	-0.108958	-0.308933	0.472531	0.586702	0.683755	0.157813	0.162194	0.0865793	0.221294	0.544561	-0.0377833	0.0527132	-0.120051	0.692872	0.670962	0.362071	0.361638	0.338095	0.304608	0.493435	0.1924	0.383917	0.114345	-0.493254	0.277788	0.338141	0.544989	0.166405	0.731113	0.0625217	0.00512761	0.387349	-0.22249	0.410146	0.730965	-0.0719155	0.213523	0.438037	0.347298	-0.0980005
Phenylalanine	-0.435391	0.440448	-0.0825833	0.609299	0.461004	0.604547	0.808855	-0.258401	0.0616305	-0.247843	0.271388	0.615688	0.228287	0.356955	0.802722	0.786838	0.528064	-0.278935	0.49155	0.223973	-0.200223	-0.714967	0.660868	0.827792	0.790779	0.509408	-0.059615	0.0715145	0.82005	0.60159	-0.0360307	0.669211	0.0698422	0.413337	0.808286	0.894175	0.696919	0.753484	-0.631795	-0.599898	0.802559	-0.677936	0.839049	0.806717	-0.00945783	0.490862	0.403936	-0.0997161	0.189033
Phosphoric acid	-0.252434	0.526682	-0.0851188	0.359689	0.29511	0.233096	-0.0564816	0.029057	0.50033	0.00227386	-0.323799	0.339272	0.385746	0.428581	-0.210214	-0.214688	-0.354038	0.656919	0.325213	0.47396	-0.168625	0.51747	0.405597	0.150502	0.1756	-0.0223711	0.814227	0.430691	0.158403	0.37187	0.544415	-0.23229	-0.145484	0.384021	0.115385	-0.0641832	0.0410472	0.0150577	0.194649	0.231227	-0.0910968	0.27276	-0.0888515	0.207433	0.567968	0.428011	0.165988	0.164121	0.374633
Pipecolic acid	-0.35476	0.283816	-0.183636	0.105514	-0.316581	0.312049	0.122795	-0.0249816	0.478882	-0.239637	0.297476	0.244169	0.135689	0.0394592	0.484296	0.455773	0.0560756	0.0139715	0.14971	0.749653	-0.650895	-0.160461	0.217458	0.245344	0.49004	0.0988079	0.202956	0.166453	0.391672	0.61391	0.0353557	0.33864	0.443529	0.381507	0.644238	0.266346	0.590093	-0.114449	-0.36312	-0.381823	0.150916	-0.115585	0.191809	0.067127	0.614138	0.548043	0.0972475	-0.394743	0.427284
4-hydroxy-proline	-0.653325	0.428194	-0.483762	0.600481	0.157229	0.567749	0.363034	-0.48674	0.29492	-0.330085	0.26959	0.733573	0.0814142	0.124673	0.76134	0.720761	0.482702	-0.16442	0.454471	0.524299	-0.51795	-0.525508	0.614964	0.73084	0.661517	0.637558	0.146186	0.163568	0.46403	0.821193	-0.0760332	0.408001	0.0374277	0.294434	0.780851	0.715957	0.63837	0.486643	-0.643722	-0.717876	0.650533	-0.500904	0.653725	0.590211	0.341604	0.772588	0.108474	-0.318462	0.0217553
Proline	-0.719086	0.352681	-0.374244	0.623153	0.134703	0.544005	0.616183	-0.524287	-0.0217242	-0.365068	0.366573	0.754665	0.0106193	0.110594	0.78103	0.737239	0.662237	-0.345056	0.33596	0.426776	-0.391538	-0.736152	0.592581	0.845908	0.835067	0.664527	0.0185415	0.170355	0.64882	0.802787	-0.13501	0.436372	-0.00998306	0.487481	0.873348	0.897832	0.765543	0.658098	-0.794265	-0.820505	0.856986	-0.554003	0.877449	0.752846	0.179474	0.739057	0.321316	-0.356943	0.02524
Putrescine	-0.0920475	0.478822	0.00702536	0.297819	0.438651	0.461804	0.331419	0.232795	0.0915704	-0.154312	-0.167922	0.0931828	0.4856	0.524625	-0.0580347	-0.0301583	-0.0618942	0.512281	0.488742	0.00429124	-0.0598265	0.0601251	0.33869	0.404439	0.136163	0.175091	0.287803	0.439834	0.342693	0.0141391	0.525216	0.194636	-0.537359	0.279656	0.186797	0.240322	-0.0287184	0.386437	0.089229	0.133345	0.114706	-0.237392	0.168458	0.487872	-0.0524607	0.0527372	0.163809	0.150522	0.0844113
Pyroglutamic acid	-0.14824	0.458417	0.351335	0.35284	0.598655	0.581118	0.795999	0.388974	0.0291938	-0.147354	0.124116	0.207789	0.613815	0.677303	0.357176	0.353443	0.0686402	0.0375793	0.391505	0.0412965	-0.0335908	-0.546612	0.415445	0.598647	0.413602	0.045509	-0.176843	-0.0899831	0.930337	0.131113	0.191364	0.571808	-0.120789	0.47291	0.449529	0.5658	0.34295	0.473983	-0.0689899	-0.236277	0.309669	-0.409139	0.361177	0.476015	-0.109005	0.0589407	0.393362	0.0575837	0.163133
Pyruvic acid	0.577559	0.236752	0.303936	-0.235466	0.103716	-0.0982767	-0.425195	0.562306	0.494511	0.283952	-0.380768	-0.451981	0.427432	0.36599	-0.396832	-0.329977	-0.600509	0.76823	0.370337	-0.0977752	-0.0667322	0.758542	0.0133589	-0.519339	-0.304164	-0.323265	0.47328	0.278857	-0.245447	-0.410776	0.63869	0.0790469	-0.0545845	-0.340486	-0.394202	-0.502277	-0.433116	-0.394117	0.55931	0.802574	-0.64806	0.339181	-0.643134	-0.354294	0.137602	-0.405071	-0.220561	0.198492	0.448245
3-caffeoyl-quinic I	0.669766	-0.199237	0.278369	-0.553848	-0.144895	-0.433614	-0.678956	0.489138	0.257331	0.416601	-0.402163	-0.70055	0.0843532	-0.0184846	-0.67194	-0.624003	-0.735435	0.444544	-0.174163	-0.275723	0.227618	0.807829	-0.45468	-0.835589	-0.709295	-0.651146	0.130325	-0.032874	-0.615199	-0.673573	0.227227	-0.308616	0.0790877	-0.508896	-0.77556	-0.880031	-0.643928	-0.691366	0.724663	0.808769	-0.884099	0.594351	-0.907306	-0.753866	0.00968301	-0.629827	-0.386439	0.252928	0.148256
3-caffeoyl-quinic II	0.615369	-0.0160221	0.269886	-0.417862	0.123429	-0.300772	-0.442152	0.433226	0.173809	0.304132	-0.24944	-0.416296	0.140339	0.077496	-0.548058	-0.488566	-0.60261	0.411447	-0.0892024	-0.371202	0.293654	0.661452	-0.315463	-0.625828	-0.614869	-0.386271	0.169532	-0.085475	-0.483832	-0.607069	0.182601	-0.19591	-0.0994867	-0.539032	-0.673466	-0.654804	-0.625323	-0.332661	0.66908	0.710253	-0.592558	0.247449	-0.628472	-0.447305	-0.15459	-0.579446	-0.365524	0.41236	0.104394
Qunic acid	0.609487	-0.183007	0.238764	-0.608646	-0.257378	-0.472997	-0.645418	0.508271	0.2121	0.332269	-0.346163	-0.730715	0.0724269	-0.0894945	-0.680051	-0.635258	-0.675572	0.408177	-0.248196	-0.100332	0.0614599	0.776626	-0.537083	-0.82878	-0.613894	-0.56523	0.122335	0.00800335	-0.59164	-0.611712	0.132358	-0.284539	0.0775369	-0.370593	-0.685544	-0.876875	-0.50012	-0.747953	0.615492	0.696089	-0.840719	0.558039	-0.852422	-0.762564	0.133053	-0.54626	-0.581951	0.117324	0.186698
Raffinose	0.348366	0.185963	0.328816	-0.419976	-0.288018	-0.0198884	-0.145945	0.677357	0.411621	0.0366163	0.126824	-0.416257	0.398657	0.269878	-0.0211254	-0.0100861	-0.371976	0.318364	0.136829	0.1427	-0.38009	0.133015	-0.168639	-0.401759	-0.0940297	-0.385043	-0.011557	-0.0646299	0.184055	-0.227223	0.248448	0.386715	0.206563	-0.166417	-0.0926253	-0.257025	-0.104372	-0.555614	0.262279	0.298156	-0.522505	0.161221	-0.49823	-0.500877	0.240154	-0.267662	-0.0384713	-0.226127	0.42999
Rhamnose	-0.303535	0.119657	-0.197807	0.27986	-0.0776726	0.232151	0.322202	-0.394922	0.2252	-0.125958	0.260749	0.462814	-0.198432	-0.103002	0.872819	0.864325	0.602091	-0.341715	0.343653	0.275843	-0.244069	-0.462425	0.418667	0.448309	0.629531	0.46891	-0.0224462	-0.00647295	0.363538	0.640743	-0.0637182	0.498333	0.415448	0.0932636	0.662932	0.633729	0.486452	0.365158	-0.695498	-0.487567	0.627305	-0.539624	0.622501	0.424601	0.0741642	0.507933	0.359284	-0.191509	0.181961
Serine	-0.264086	0.251113	0.248119	0.273392	0.467721	0.478903	0.860106	0.163428	-0.186107	-0.216097	0.282526	0.260617	0.308599	0.396765	0.426729	0.398882	0.261394	-0.313306	0.119453	-0.0406228	0.0849847	-0.754333	0.240782	0.632211	0.384305	0.066749	-0.428322	-0.255483	0.852738	0.167237	-0.172026	0.474752	-0.0569093	0.451004	0.450914	0.614638	0.376626	0.529339	-0.2357	-0.4514	0.47096	-0.515224	0.515912	0.489044	-0.251186	0.0919908	0.432161	0.0445018	-0.0353005
Serine-o-actyle	-0.679242	0.46281	-0.331861	0.359195	0.000665069	0.569066	0.585889	-0.342415	0.115895	-0.357412	0.570626	0.71963	0.0532427	0.0825315	0.570876	0.510622	0.346566	-0.194265	0.104856	0.57922	-0.478989	-0.567365	0.409482	0.674691	0.619469	0.38761	0.102596	0.124982	0.610427	0.778692	-0.172948	0.29105	0.125602	0.58204	0.843418	0.673721	0.664969	0.468817	-0.549979	-0.63316	0.657559	-0.505853	0.701633	0.59092	0.312826	0.719651	0.345469	-0.184355	0.114517
Succinic acid	0.29814	-0.12167	0.189789	-0.422724	-0.32065	-0.371825	-0.588063	0.352566	0.296983	0.281857	-0.385683	-0.400194	0.0613095	-0.110553	-0.65753	-0.656504	-0.690152	0.416028	-0.345769	0.270336	0.00175893	0.811715	-0.361602	-0.630152	-0.467026	-0.529226	0.370847	0.0632683	-0.447695	-0.231402	0.218183	-0.57728	0.228969	-0.0475227	-0.448545	-0.793779	-0.3552	-0.750676	0.596148	0.556432	-0.724933	0.680721	-0.746851	-0.659325	0.447914	-0.160436	-0.315238	0.154132	0.190765
Sucrose	-0.0979922	0.0348362	-0.178946	0.0218019	-0.122423	-0.0943034	0.0172312	-0.0937755	0.238351	-0.721824	0.336424	0.0800273	-0.119727	-0.154163	0.29486	0.275605	0.18793	-0.0215263	0.0591201	0.365118	-0.353252	-0.114745	0.00150633	0.132815	0.145891	0.124072	0.085642	0.00541127	0.159095	0.332167	-0.127443	0.233535	0.285794	0.158305	0.28574	0.124829	0.24889	-0.0698904	-0.290703	-0.279978	0.188603	-0.356347	0.258057	0.157053	0.24371	0.350361	0.323361	-0.155372	0.334998
Trehalose	0.10005	0.513336	0.132191	0.255756	0.291949	0.217257	0.0938293	0.131005	0.543562	0.197092	-0.22437	0.18272	0.416889	0.45429	0.458246	0.511832	0.0367408	0.426737	0.742307	0.321662	-0.355157	0.117423	0.625025	0.17831	0.561234	0.311226	0.448582	0.260974	0.389598	0.34458	0.602284	0.582247	0.221908	0.129928	0.425254	0.316778	0.316252	0.173215	-0.264217	0.0972018	0.195943	-0.226807	0.176737	0.274029	0.277068	0.246988	0.0249331	-0.0239028	0.586897
Threonic acid	0.609673	-0.0485157	0.483547	-0.54312	-0.142057	-0.224058	-0.400305	0.845812	0.298917	0.107016	-0.112473	-0.624373	0.382118	0.172272	-0.515406	-0.49039	-0.67697	0.518975	-0.094644	-0.031641	-0.0893712	0.513112	-0.386729	-0.623727	-0.636526	-0.569072	0.0366594	-0.202148	-0.201676	-0.557	0.321714	-0.112862	0.117708	-0.233331	-0.475257	-0.660184	-0.53644	-0.700752	0.795772	0.668427	-0.841571	0.361381	-0.823152	-0.700474	0.103401	-0.519714	-0.192755	0.192765	0.132543
Threonine	-0.382656	0.344033	0.20147	0.520393	0.518649	0.554718	0.863577	-0.00684917	-0.130166	-0.259968	0.255676	0.518642	0.363607	0.453014	0.609376	0.583045	0.424083	-0.237507	0.336213	0.125376	-0.115403	-0.777221	0.55524	0.807758	0.627718	0.385197	-0.192985	-0.123111	0.908611	0.416912	0.00877732	0.507598	-0.0486972	0.534859	0.701614	0.848416	0.540501	0.697292	-0.38434	-0.530511	0.678666	-0.577875	0.710691	0.690365	-0.129399	0.333336	0.518053	0.00777161	-0.0186905
Tryptophan	-0.274341	0.0507456	-0.234958	0.433708	0.196966	0.0712272	0.388227	-0.637303	-0.148963	-0.181368	0.228641	0.651643	-0.409252	-0.25828	0.624882	0.630929	0.750059	-0.346319	0.213561	0.0892516	0.0561166	-0.370692	0.440489	0.536309	0.587469	0.72974	0.112502	0.00306582	0.203627	0.596271	-0.128895	0.224432	0.227135	0.171814	0.583808	0.665015	0.418766	0.688277	-0.691939	-0.461068	0.910104	-0.668049	0.891265	0.741452	-0.165526	0.493872	0.247177	0.108796	0.0897445
Tyrosine	-0.628542	0.452767	-0.279598	0.756663	0.31965	0.650127	0.718236	-0.429536	0.0397469	-0.285802	0.204329	0.75461	0.191321	0.291738	0.747875	0.717659	0.593217	-0.225957	0.500545	0.414692	-0.333534	-0.637222	0.741431	0.906844	0.872595	0.667515	0.136579	0.284658	0.733343	0.767309	0.0480404	0.483337	-0.0375274	0.50542	0.896808	0.91763	0.770904	0.74114	-0.690904	-0.676064	0.844682	-0.541581	0.878305	0.866526	0.18741	0.698364	0.349392	-0.233536	0.122316
Urea	-0.174205	-0.322078	-0.0543925	0.553433	0.208985	-0.0484791	0.0680893	-0.377045	-0.597075	0.173872	-0.28767	0.223026	-0.149291	-0.0401927	-0.271288	-0.260217	0.23586	-0.132721	-0.11659	-0.22381	0.447028	-0.0140759	0.16954	0.250342	0.12286	0.179775	0.114039	0.116546	-0.0811737	-0.0333278	0.113436	-0.469214	-0.26592	0.253942	-0.0504315	0.174837	0.106217	0.382548	0.0205364	-0.0723673	0.256589	0.392838	0.236033	0.319335	-0.193271	0.00434434	0.120414	0.0784863	-0.252566
Valine	-0.507926	0.216513	-0.190713	0.60558	0.264062	0.385796	0.669687	-0.504629	-0.188684	-0.321156	0.381245	0.741511	-0.0833631	0.0274776	0.756018	0.735934	0.73733	-0.419887	0.269488	0.252028	-0.18768	-0.723822	0.569281	0.7975	0.795091	0.726471	-0.0270587	0.00755829	0.605327	0.686222	-0.164336	0.425301	0.10465	0.431123	0.825092	0.910561	0.714957	0.775172	-0.743065	-0.729356	0.961507	-0.664399	0.972445	0.81839	-0.0382087	0.589149	0.322634	-0.140603	0.0500584
DGDG 32:3	0.730878	-0.19258	0.577466	-0.377627	0.18951	-0.225995	-0.228995	0.709642	-0.109846	0.322769	-0.31948	-0.703703	0.350628	0.301662	-0.555928	-0.488804	-0.571755	0.336934	-0.0389565	-0.616188	0.42846	0.386364	-0.312436	-0.532068	-0.613132	-0.569503	-0.170746	-0.145152	-0.211625	-0.887034	0.341476	-0.0526553	-0.186134	-0.387509	-0.685538	-0.520307	-0.61257	-0.292155	0.759642	0.743169	-0.674088	0.352077	-0.667988	-0.462709	-0.417223	-0.863357	-0.0545193	0.330812	-0.0217552
DGDG 32:1	0.010026	0.255345	-0.0167742	0.0646172	-0.0107419	0.249567	-0.0112983	0.33104	0.36551	-0.168928	0.133123	-0.084011	0.416527	0.257984	0.224858	0.250418	-0.219907	0.20157	0.220939	0.481735	-0.491699	-0.0777454	0.129934	0.0937399	0.220219	-0.019972	0.0499436	0.0348399	0.343436	0.158593	0.179321	0.442398	0.257735	0.249247	0.321427	0.0524867	0.433938	-0.169119	-0.0382962	-0.210543	-0.11167	-0.039834	-0.0767262	-0.0900457	0.415988	0.124719	-0.28153	-0.346746	0.413074
DGDG 32:0	-0.589543	0.416655	-0.258098	0.661801	0.205389	0.654344	0.578078	-0.34828	0.134468	-0.313479	0.261325	0.67207	0.264371	0.296528	0.82595	0.799764	0.508742	-0.216526	0.506803	0.466265	-0.510039	-0.663877	0.716284	0.829166	0.816764	0.645208	0.0740773	0.232072	0.682678	0.734515	0.0545612	0.553665	0.0188208	0.411513	0.90604	0.882268	0.776261	0.618599	-0.649356	-0.695996	0.723463	-0.516545	0.751584	0.695958	0.244866	0.66484	0.28908	-0.344393	0.064155
DGDG 34:4	-0.543885	0.25085	-0.151885	0.450715	0.196822	0.4456	0.710413	-0.220457	-0.27413	-0.227985	0.344298	0.567159	0.0609841	0.148943	0.663329	0.626732	0.571623	-0.235061	0.207742	0.313718	-0.181107	-0.84885	0.459967	0.791926	0.619134	0.486295	-0.191376	-0.0907	0.782521	0.571541	0.0508904	0.39287	-0.00327146	0.794544	0.737293	0.841277	0.560262	0.598948	-0.570014	-0.677985	0.748717	-0.56856	0.77003	0.642202	-0.0294322	0.530273	0.399858	-0.177703	-0.137569
DGDG 34:3	0.218952	0.235287	0.271488	0.100885	0.443936	0.348355	-0.00314236	0.446589	0.196642	0.194387	-0.338725	-0.24513	0.665431	0.625546	-0.030717	0.0191298	-0.400423	0.414645	0.449952	-0.214811	-0.0421283	0.0640286	0.27613	0.0735413	-0.14591	-0.1298	-0.0214521	0.123249	0.146805	-0.338507	0.499901	0.250958	-0.341734	-0.0802501	-0.0989125	0.00924253	-0.165126	0.108702	0.379467	0.304423	-0.306782	0.0551299	-0.299971	-0.035888	-0.140622	-0.317761	-0.00508034	0.123663	-0.147896
DGDG 34:2	-0.616207	0.375021	-0.312489	0.687303	0.184372	0.517573	0.475206	-0.548213	0.107206	-0.189548	0.143982	0.8028	0.0807487	0.156769	0.820791	0.792925	0.660647	-0.204949	0.529833	0.436267	-0.452247	-0.555157	0.774245	0.801885	0.848803	0.827452	0.206776	0.247833	0.512088	0.826926	0.0781038	0.39829	-0.0035305	0.336186	0.87905	0.894103	0.677751	0.667363	-0.738305	-0.654345	0.834188	-0.519363	0.820582	0.747065	0.214912	0.758031	0.255752	-0.247732	-0.0193335
DGDG 34:0	-0.29797	0.417849	-0.147158	0.417636	0.120845	0.533196	0.211912	-0.00503206	0.439719	-0.142799	-0.146945	0.414778	0.49926	0.357829	0.241455	0.20259	-0.110558	0.162761	0.354779	0.577271	-0.460975	0.0245197	0.500958	0.407111	0.214243	0.247458	0.381393	0.338606	0.274145	0.447321	0.271982	0.0215881	-0.0214365	0.165347	0.457914	0.221053	0.266701	0.109599	0.0692084	-0.0791417	0.0829009	-0.0881045	0.112552	0.27565	0.525672	0.493175	0.157767	0.0269698	-0.0272316
DGDG 36:6	-0.199269	0.210608	0.0364571	0.411757	0.224332	0.372265	0.57779	-0.103487	-0.000604033	-0.217331	0.303558	0.328244	0.228487	0.264439	0.796458	0.807515	0.471913	-0.358267	0.390968	0.184153	-0.313438	-0.706129	0.475866	0.558613	0.7202	0.431013	-0.214819	-0.0469195	0.682043	0.383092	-0.0719936	0.764463	0.211828	0.245658	0.684758	0.752913	0.721187	0.507131	-0.588366	-0.560493	0.611591	-0.530809	0.640833	0.494232	-0.0134481	0.270927	0.226964	-0.297375	0.22944
DGDG 36:5	-0.225684	0.19686	0.203653	0.253156	0.244672	0.374927	0.694298	0.122607	-0.0986915	-0.307374	0.374388	0.280025	0.280981	0.290803	0.670059	0.654693	0.41142	-0.341474	0.226924	0.163626	-0.236954	-0.810188	0.326063	0.585883	0.529739	0.300353	-0.384824	-0.263004	0.805635	0.308311	-0.105975	0.625646	0.136099	0.399545	0.621398	0.703328	0.532282	0.429815	-0.411716	-0.555544	0.529962	-0.59031	0.565047	0.412648	-0.0994662	0.224008	0.363216	-0.175336	0.0191106
DGDG 36:4	-0.529494	0.119576	-0.0157731	0.368773	0.0279306	0.346006	0.299644	-0.20192	0.00503445	-0.25955	0.045238	0.586919	0.143819	0.0437639	0.441665	0.390415	0.306272	-0.169115	0.0733568	0.526681	-0.355133	-0.367669	0.433104	0.604411	0.384793	0.549284	0.106178	-0.00458813	0.351167	0.617458	0.0576748	-0.11406	0.0153403	0.425305	0.63765	0.5168	0.354431	0.303731	-0.23399	-0.506968	0.457723	-0.293581	0.435076	0.347809	0.280689	0.625301	0.231836	-0.0631977	-0.378329
DGDG 36:2	0.363185	-0.0595714	0.150535	-0.336219	-0.21661	-0.319667	-0.655027	0.372726	0.333139	0.240703	-0.480268	-0.419923	0.185692	0.00211447	-0.640248	-0.617845	-0.638335	0.546884	-0.11568	0.140859	-0.0890763	0.862049	-0.278446	-0.611063	-0.494037	-0.340787	0.438528	0.18403	-0.55331	-0.334017	0.32566	-0.477469	-0.0496457	-0.264915	-0.507947	-0.748889	-0.459927	-0.654985	0.630789	0.629748	-0.741644	0.613636	-0.769841	-0.596902	0.364269	-0.235564	-0.43948	0.142091	0.0927598
DGDG 38:6	0.132793	0.0451837	0.478719	0.0665851	0.323658	0.233026	0.604273	0.353606	-0.217915	-0.163478	0.284615	-0.0276674	0.34956	0.371378	0.433217	0.456439	0.163575	-0.284282	0.13698	-0.233787	0.0583057	-0.62817	0.156415	0.311914	0.260831	0.0225857	-0.466879	-0.307098	0.647665	-0.138178	-0.0287265	0.600038	0.0665295	0.132604	0.279962	0.481476	0.259078	0.382301	-0.092644	-0.196768	0.279101	-0.447172	0.318443	0.24261	-0.387132	-0.229952	0.414655	0.017505	0.0364065
DGDG 38:5	0.226996	0.17137	0.165822	0.0327114	-0.113764	-0.156465	-0.326003	0.0687078	0.460931	0.10666	-0.266247	0.0118858	0.241526	0.177694	0.129526	0.189735	-0.167361	0.368199	0.344185	0.262697	-0.361906	0.529343	0.26921	-0.248654	0.304579	0.176417	0.647991	0.378577	-0.13975	0.110419	0.448587	0.172367	0.155222	-0.244411	0.086883	-0.0636892	0.119519	-0.124515	-0.00748491	0.323788	-0.0979334	0.17524	-0.130567	-0.0707598	0.383463	0.0792629	-0.0434877	-0.0533999	0.542877
MGDG 32:1	-0.635867	0.656399	-0.378026	0.329181	0.0570895	0.486657	0.0603434	-0.0362067	0.564255	-0.265275	-0.158717	0.398494	0.434663	0.387963	0.162357	0.122667	-0.100195	0.450546	0.400265	0.769377	-0.632106	0.0850154	0.387454	0.436835	0.401801	0.256368	0.528358	0.482828	0.351765	0.631426	0.30605	0.0532251	-0.324869	0.475893	0.430564	0.188709	0.313897	0.00131762	-0.208935	-0.318406	0.0707216	-0.0168307	0.0761271	0.232927	0.738061	0.714268	-0.0772282	-0.322654	0.13928
MGDG 32:0	-0.605152	0.280888	-0.260578	0.650396	0.172181	0.617378	0.631829	-0.435482	-0.0667942	-0.274291	0.313441	0.705723	0.120492	0.182814	0.783042	0.741663	0.629583	-0.347968	0.392443	0.307303	-0.363232	-0.775106	0.654301	0.853784	0.725802	0.652046	-0.0682563	0.128098	0.632394	0.677772	-0.0382555	0.430401	-0.0208272	0.381711	0.86078	0.921529	0.673858	0.685032	-0.64092	-0.708033	0.790579	-0.533515	0.813133	0.727383	0.0583354	0.608077	0.405515	-0.255842	-0.137272
MGDG 34:2	-0.645457	0.4217	-0.221371	0.661025	0.265035	0.618217	0.659227	-0.439906	0.0143727	-0.204798	0.250102	0.78881	0.156583	0.266716	0.794106	0.753495	0.61803	-0.258531	0.473917	0.338078	-0.354567	-0.711465	0.743761	0.859088	0.81444	0.689292	0.0593201	0.165478	0.684409	0.754207	0.0322407	0.439746	-0.061399	0.423755	0.863299	0.942492	0.654245	0.721702	-0.676761	-0.664736	0.825421	-0.552196	0.830488	0.76993	0.109165	0.67957	0.406832	-0.218192	-0.0685264
MGDG 34:1	-0.36085	0.303595	0.0519317	0.468952	0.326679	0.505657	0.391391	-0.244206	0.108237	0.118612	-0.149925	0.595088	0.272858	0.343377	0.39902	0.351421	0.222253	0.00911826	0.418238	0.096526	-0.108127	-0.273237	0.694727	0.565328	0.300996	0.391314	0.1751	0.146043	0.340253	0.428757	0.30132	-0.0106326	-0.143116	0.147171	0.471976	0.559148	0.0756029	0.500841	-0.105997	-0.0808659	0.394601	-0.247032	0.371077	0.489913	-0.00948787	0.403758	0.579942	0.260048	-0.379921
MGDG 36:5	-0.550924	0.461732	-0.252729	0.517169	0.0891125	0.497236	0.511708	-0.322832	0.197252	-0.25709	0.297257	0.630762	0.171892	0.221179	0.828031	0.807281	0.537633	-0.188261	0.479399	0.543148	-0.562839	-0.59603	0.629151	0.686817	0.902668	0.633748	0.125521	0.20177	0.676347	0.776525	0.02258	0.619029	0.12101	0.421273	0.876448	0.812464	0.800121	0.487729	-0.763883	-0.689966	0.714849	-0.508332	0.726525	0.600617	0.332041	0.689372	0.16509	-0.432438	0.263877
MGDG 36:4	-0.040159	0.471977	0.164363	0.0703127	0.102397	0.203891	0.0833124	0.350842	0.571238	-0.012017	-0.103529	0.0417362	0.543471	0.481611	0.404065	0.419197	-0.0904027	0.252501	0.495137	0.448713	-0.543502	-0.0386654	0.320563	0.0823864	0.435957	0.115326	0.203609	0.0742129	0.451617	0.263654	0.275895	0.555227	0.0943824	0.0995308	0.28936	0.17147	0.311496	-0.132987	-0.156551	-0.0978695	-0.057012	-0.093671	-0.0708263	-0.0633017	0.465729	0.231635	-0.12413	-0.310216	0.410313
MGDG 36:3 (1)	-0.43674	0.295319	0.0124626	0.574067	0.369555	0.689635	0.681111	-0.191784	-0.0522388	-0.201446	0.189634	0.609146	0.329207	0.375582	0.665523	0.62919	0.392112	-0.269983	0.402234	0.101567	-0.170431	-0.687431	0.672563	0.794291	0.478216	0.491762	-0.106807	0.0635459	0.625154	0.449351	0.0898339	0.342434	-0.126765	0.242604	0.681824	0.815349	0.393047	0.694285	-0.287599	-0.440507	0.598164	-0.525822	0.622733	0.649025	-0.0952585	0.393126	0.544865	-0.000169992	-0.321934
MGDG 38:6	0.00969785	-0.489311	-0.188054	-0.230302	-0.51309	-0.530262	-0.470716	-0.208637	-0.229271	-0.162726	-0.268069	-0.432118	-0.351347	-0.487883	-0.3297	-0.331284	-0.0701951	-0.285934	-0.483745	0.196894	-0.0453271	0.312232	-0.455449	-0.389784	-0.108375	-0.0936176	-0.0207424	0.230117	-0.537112	-0.141334	-0.334954	-0.403111	0.047195	-0.0503581	-0.312036	-0.474333	0.1137	-0.49691	-0.0906515	-0.0917134	-0.270095	0.46294	-0.257542	-0.415001	0.318889	-0.00637174	-0.504412	-0.443065	-0.0478952
MGDG 38:4	0.688565	-0.292468	0.662126	-0.477373	0.0169088	-0.313038	-0.290125	0.455117	0.0188353	0.458481	-0.341161	-0.438475	0.0890013	-0.0110279	-0.415854	-0.376758	-0.491666	0.244181	-0.184661	-0.419071	0.371594	0.553301	-0.205806	-0.540565	-0.594383	-0.38797	0.030594	-0.184809	-0.418096	-0.583662	0.295052	-0.339448	0.183064	-0.429925	-0.453807	-0.489318	-0.655256	-0.271947	0.715413	0.817479	-0.503372	0.228292	-0.537152	-0.426369	-0.336388	-0.613909	0.0917529	0.665996	-0.143496
PC 32:2 (1)	0.181856	0.382975	-0.0520353	0.013613	0.174796	0.176972	-0.405633	0.311508	0.629869	0.0881491	-0.310901	-0.128948	0.470868	0.39792	-0.169034	-0.136949	-0.474322	0.698434	0.482985	0.0940042	-0.301943	0.525668	0.174682	-0.196439	-0.230033	-0.0800728	0.451705	0.279335	-0.188878	-0.110794	0.490134	0.0846949	-0.251402	-0.309243	-0.202901	-0.294966	-0.304232	-0.243211	0.393848	0.418035	-0.48244	0.190689	-0.496102	-0.206848	0.285034	-0.066754	-0.278004	0.0547032	0.164165
PC 32:1 (1)	-0.714223	0.528256	-0.380882	0.734724	0.184417	0.624548	0.377819	-0.319956	0.212401	-0.378161	0.0739701	0.655039	0.365184	0.380712	0.532763	0.506156	0.324213	0.0958841	0.516773	0.657545	-0.598113	-0.376521	0.699983	0.7863	0.799019	0.601906	0.384665	0.471156	0.609329	0.771528	0.249455	0.328246	-0.207235	0.579997	0.798905	0.70228	0.744464	0.466155	-0.544146	-0.641938	0.55525	-0.225139	0.58182	0.64065	0.519423	0.776894	0.147238	-0.459301	0.16631
PC 32:0	-0.720199	0.398395	-0.521857	0.74722	0.118185	0.446327	0.193064	-0.633086	0.259259	-0.28766	-0.0555438	0.771059	0.0915025	0.140112	0.57514	0.54962	0.443147	-0.0215985	0.475257	0.606357	-0.503807	-0.198635	0.69801	0.691156	0.765411	0.74841	0.513382	0.501616	0.277616	0.854611	0.124536	0.142569	-0.159012	0.321334	0.705351	0.634344	0.643036	0.490457	-0.628143	-0.597305	0.633659	-0.221642	0.620196	0.642851	0.513526	0.867173	0.0822573	-0.348863	0.0654742
PC 34:3	0.375895	-0.242053	0.446231	-0.149309	-0.0463623	-0.243433	-0.374827	0.564684	-0.0232421	0.0384878	-0.231475	-0.328223	0.235878	0.0450661	-0.559964	-0.551798	-0.361909	0.439037	-0.127246	0.00210035	0.00990212	0.423727	-0.206695	-0.344571	-0.487466	-0.202828	0.151799	-0.211778	-0.215303	-0.365331	0.365879	-0.432606	-0.0172758	-0.0301569	-0.336758	-0.438375	-0.442362	-0.479257	0.718784	0.429981	-0.572672	0.469707	-0.586429	-0.469435	0.081573	-0.314427	-0.202004	0.173936	-0.115237
PC 34:2	0.597094	-0.0042516	0.165098	-0.190047	0.0333576	-0.0346285	-0.30524	0.526373	0.304854	0.0878852	-0.188254	-0.494503	0.362586	0.246375	-0.139691	-0.0769188	-0.382523	0.351395	0.299896	-0.22077	-0.0198861	0.336369	-0.0881048	-0.380891	-0.42334	-0.264924	-0.000691295	0.027825	-0.20715	-0.499715	0.375149	0.232267	0.00335544	-0.493928	-0.365479	-0.367479	-0.368335	-0.318924	0.4903	0.534938	-0.544422	0.104242	-0.515163	-0.341738	-0.0702267	-0.47785	-0.13391	0.0877007	0.135168
PC 34:1	0.37321	0.109897	0.220649	-0.335216	-0.0567367	-0.177979	-0.547765	0.608296	0.461541	0.176163	-0.467542	-0.56996	0.449984	0.314997	-0.595532	-0.567863	-0.777632	0.644814	0.0523739	0.0694181	-0.115568	0.74197	-0.260491	-0.582939	-0.476209	-0.560078	0.318396	0.174539	-0.29982	-0.446613	0.391942	-0.203579	-0.167485	-0.220463	-0.572528	-0.728015	-0.445589	-0.685967	0.670299	0.632989	-0.88385	0.624321	-0.884134	-0.642526	0.357249	-0.342609	-0.325571	0.0179676	0.211044
PC 36:6	-0.736052	0.25697	-0.405484	0.819817	0.178832	0.475717	0.495307	-0.668531	-0.147804	-0.269666	0.0383911	0.786217	-0.00854993	0.102686	0.530474	0.489797	0.621559	-0.249143	0.335827	0.408441	-0.228648	-0.46912	0.694035	0.839756	0.804119	0.721288	0.274753	0.419162	0.460625	0.775011	0.0615684	0.0940214	-0.161915	0.511436	0.756631	0.798425	0.688234	0.679517	-0.670483	-0.662728	0.81487	-0.269531	0.828087	0.819184	0.243133	0.767385	0.324861	-0.286187	-0.0527585
PC 36:5	-0.0421251	0.280186	-0.131412	0.241711	-0.018545	0.159287	-0.109601	-0.138621	0.530068	0.131029	-0.277013	0.157593	0.213115	0.111416	0.345753	0.376095	-0.0928299	0.146015	0.371959	0.605801	-0.436545	0.285693	0.441593	0.0833431	0.478897	0.266683	0.489778	0.421108	0.0533333	0.444836	0.274143	0.2534	0.394882	0.0900264	0.423191	0.0756823	0.511958	-0.0329558	-0.260274	-0.0519413	0.0969488	0.0118663	0.0909079	0.107898	0.597929	0.39916	-0.314565	-0.18839	0.492087
PC 36:4	0.589642	-0.0398542	0.396967	-0.412642	0.08652	-0.287274	-0.474021	0.689572	0.234722	0.252922	-0.435661	-0.67947	0.383669	0.280527	-0.713421	-0.668692	-0.756423	0.566851	-0.0497388	-0.270336	0.160787	0.701055	-0.386762	-0.659644	-0.647352	-0.62932	0.133197	-0.0184866	-0.359066	-0.715981	0.304677	-0.219189	-0.208489	-0.347895	-0.746355	-0.761669	-0.617697	-0.581151	0.805902	0.763744	-0.878281	0.559263	-0.881832	-0.634012	0.0130597	-0.631882	-0.30714	0.24321	0.117669
PC 36:3	0.626366	-0.120744	0.368492	-0.529805	-0.0318263	-0.378725	-0.564984	0.658605	0.225461	0.279307	-0.398285	-0.718241	0.253535	0.143691	-0.739778	-0.697907	-0.759803	0.529772	-0.147305	-0.28375	0.197639	0.74223	-0.481289	-0.75562	-0.736124	-0.672014	0.0998068	-0.0705534	-0.469949	-0.730676	0.256998	-0.29459	-0.122254	-0.403654	-0.80181	-0.846406	-0.693941	-0.667721	0.81404	0.79399	-0.916704	0.566591	-0.926781	-0.722692	-0.006338	-0.649655	-0.316316	0.263086	0.0861419
PC 36:2	0.572085	-0.0476336	0.397244	-0.414088	0.0903254	-0.278292	-0.486397	0.63488	0.242418	0.272833	-0.474728	-0.622276	0.360736	0.255563	-0.71716	-0.678856	-0.759671	0.562164	-0.060869	-0.286289	0.185017	0.742232	-0.354795	-0.649185	-0.694124	-0.593147	0.173431	0.00219935	-0.426842	-0.695184	0.314446	-0.312153	-0.233624	-0.397404	-0.751138	-0.764336	-0.690812	-0.548506	0.842611	0.810329	-0.863822	0.537554	-0.874944	-0.611596	-0.00619221	-0.60252	-0.248137	0.336375	0.0137889
PC 38:6	-0.727701	0.498324	-0.26345	0.792199	0.309954	0.69106	0.526183	-0.400501	0.125444	-0.283293	-0.0246655	0.770378	0.361462	0.418719	0.569382	0.53276	0.39059	0.00123334	0.526659	0.476021	-0.425905	-0.408189	0.799216	0.884147	0.76861	0.665479	0.365065	0.472278	0.592598	0.746014	0.247282	0.224138	-0.311632	0.477936	0.798791	0.807755	0.61199	0.667161	-0.487234	-0.550736	0.662283	-0.311149	0.676003	0.778934	0.328098	0.744963	0.370907	-0.215356	-0.0618092
PC 38:5 (1)	0.462346	0.118379	0.456657	-0.17142	0.291886	-0.0330942	-0.273202	0.655879	0.254207	0.185513	-0.498465	-0.464793	0.598325	0.50776	-0.608133	-0.569617	-0.731046	0.63396	0.136692	-0.252641	0.115988	0.636199	-0.102278	-0.393756	-0.513202	-0.46587	0.27094	0.141761	-0.188614	-0.604752	0.472464	-0.193371	-0.381496	-0.27869	-0.557663	-0.528759	-0.55956	-0.312468	0.825016	0.751624	-0.725635	0.454569	-0.720358	-0.366186	0.00213653	-0.519346	-0.0724111	0.349467	0.0315279
PC 38:4	0.577583	-0.171039	0.259795	-0.625049	-0.349814	-0.481596	-0.592543	0.587315	0.272018	0.279759	-0.281208	-0.683852	0.0876455	-0.0995162	-0.701388	-0.670523	-0.717141	0.405975	-0.32796	-0.0424235	0.0844904	0.762788	-0.595459	-0.85483	-0.628536	-0.672487	0.136348	-0.0674084	-0.504412	-0.588564	0.0921589	-0.297901	0.235926	-0.359187	-0.708033	-0.898625	-0.523252	-0.828089	0.732064	0.70893	-0.911988	0.614564	-0.913309	-0.804854	0.215419	-0.514889	-0.455236	0.104346	0.301571
PC 38:3	0.650529	-0.156382	0.429318	-0.475666	0.0315161	-0.392268	-0.521857	0.630206	0.129652	0.318617	-0.436938	-0.680687	0.249654	0.153858	-0.78169	-0.73953	-0.725583	0.51823	-0.15223	-0.358663	0.273721	0.74354	-0.436817	-0.730453	-0.739784	-0.632156	0.116018	-0.0715373	-0.479584	-0.763051	0.285405	-0.358247	-0.159643	-0.401165	-0.810166	-0.810247	-0.724403	-0.587907	0.849463	0.843165	-0.869921	0.577046	-0.883313	-0.659357	-0.0844766	-0.681564	-0.256513	0.3529	0.0290123
PC 38:2 (1)	0.382903	0.0376152	0.197245	-0.335307	-0.110399	-0.205424	-0.479734	0.587746	0.292841	0.0560759	-0.38284	-0.607577	0.397083	0.245207	-0.713518	-0.688122	-0.780223	0.567412	-0.0970938	0.0432035	-0.052937	0.732594	-0.363615	-0.581469	-0.497909	-0.602213	0.293896	0.238383	-0.304793	-0.515915	0.305742	-0.261186	-0.194671	-0.172585	-0.585924	-0.755702	-0.389859	-0.6616	0.686329	0.613556	-0.852576	0.644728	-0.823602	-0.583233	0.322232	-0.397135	-0.299616	0.00655329	0.263173
PE 34:2	0.741738	-0.536811	0.635146	-0.414926	0.0355468	-0.34558	-0.124637	0.580543	-0.442304	0.219948	-0.0792102	-0.599157	-0.00079906	-0.101527	-0.391859	-0.351761	-0.137604	0.0287304	-0.224756	-0.658853	0.469438	0.0473591	-0.381372	-0.390023	-0.666203	-0.29283	-0.493952	-0.511032	-0.231692	-0.788121	0.145029	-0.153754	0.066304	-0.317217	-0.473856	-0.313008	-0.622199	-0.208307	0.623344	0.512874	-0.392563	0.066425	-0.395219	-0.385264	-0.683509	-0.811354	0.0186646	0.431692	-0.354188
PE 36:6	-0.761631	0.533409	-0.53604	0.725549	0.184137	0.626292	0.243917	-0.543481	0.260186	-0.198418	-0.137326	0.725593	0.222569	0.304744	0.412965	0.380867	0.273432	0.153893	0.525182	0.503768	-0.407924	-0.136578	0.722851	0.729314	0.644693	0.597221	0.538369	0.659401	0.314742	0.754115	0.297086	0.0674225	-0.384992	0.363672	0.626559	0.583208	0.477478	0.522082	-0.477338	-0.447487	0.518161	-0.154773	0.519265	0.676987	0.445726	0.788517	0.203059	-0.263814	-0.0223114
PE 36:4	0.482044	0.0325394	0.237627	-0.148171	0.0258221	-0.227693	-0.497004	0.513723	0.277931	0.209332	-0.516161	-0.519316	0.415691	0.308369	-0.624002	-0.573605	-0.629201	0.630897	0.133624	-0.0612456	-0.00635183	0.760501	-0.155876	-0.537516	-0.378471	-0.405055	0.400823	0.260172	-0.320717	-0.505702	0.487459	-0.183522	-0.197593	-0.263924	-0.550029	-0.625816	-0.383773	-0.510352	0.634357	0.687447	-0.735126	0.634542	-0.731971	-0.455997	0.228579	-0.417775	-0.296128	0.0749612	0.302577
PE 36:3 (1)	-0.274591	0.334423	-0.214451	0.274263	0.1261	0.244782	-0.312153	-0.0776459	0.379631	0.0371027	-0.57782	0.0971561	0.409901	0.389512	-0.249817	-0.246563	-0.394247	0.516279	0.313125	0.209074	-0.213549	0.535145	0.281036	0.0589246	0.0117874	0.0516816	0.625258	0.659006	-0.207276	0.0861812	0.438724	-0.290801	-0.598993	-0.0697986	-0.127251	-0.167397	-0.121979	-0.0343339	0.213182	0.201063	-0.27605	0.417403	-0.299812	0.0209177	0.43123	0.214634	-0.105838	-0.0776777	-0.0740329
PE 36:3 (2)	0.434128	0.0101429	0.190787	-0.415354	-0.06199	-0.300505	-0.605295	0.548667	0.325047	0.230217	-0.473489	-0.634952	0.304466	0.201108	-0.732247	-0.696341	-0.775021	0.605673	-0.0755067	-0.0985621	0.0521453	0.798474	-0.403526	-0.676202	-0.585638	-0.609022	0.262969	0.137691	-0.444798	-0.577082	0.294196	-0.301215	-0.234817	-0.299951	-0.728782	-0.823053	-0.553005	-0.671271	0.692908	0.683234	-0.89119	0.652835	-0.901563	-0.665383	0.210202	-0.466384	-0.398786	0.0923995	0.168199
PE 38:4	0.506534	-0.110384	0.233996	-0.461562	-0.179642	-0.368863	-0.672038	0.517209	0.250906	0.274193	-0.43929	-0.627262	0.217849	0.0711771	-0.767163	-0.731837	-0.761246	0.572894	-0.168568	-0.0968776	0.0558053	0.845335	-0.423559	-0.738212	-0.644162	-0.574473	0.281448	0.112131	-0.55357	-0.590772	0.313102	-0.412646	-0.119546	-0.341893	-0.705372	-0.851888	-0.584834	-0.70348	0.747403	0.745237	-0.889287	0.682965	-0.904425	-0.703497	0.182507	-0.493516	-0.380811	0.160647	0.120191
PE 38:3	-0.548198	0.341008	-0.161672	0.599678	0.25814	0.643846	0.674173	-0.376404	-0.00976479	-0.22357	0.316657	0.744405	0.140913	0.221602	0.816119	0.777988	0.579028	-0.311171	0.421924	0.266133	-0.27714	-0.746731	0.708619	0.847468	0.683642	0.634214	-0.0448216	0.0733103	0.663346	0.683317	0.0287012	0.433714	0.0369105	0.35656	0.855293	0.920224	0.578528	0.721958	-0.572632	-0.618743	0.793838	-0.629367	0.809292	0.74187	0.00338572	0.591382	0.483886	-0.118091	-0.142147
PE 38:2	0.326006	0.263259	0.429366	-0.0862793	0.336299	0.0746812	-0.204783	0.698972	0.395747	0.143191	-0.493622	-0.338684	0.709938	0.594269	-0.478178	-0.45278	-0.680268	0.687898	0.24749	-0.025152	-0.0648131	0.547722	0.00884569	-0.254832	-0.380216	-0.360109	0.310468	0.0944676	-0.0142715	-0.406598	0.507863	-0.114895	-0.349271	-0.117923	-0.389841	-0.423209	-0.43919	-0.320832	0.744248	0.601341	-0.664001	0.382258	-0.66757	-0.328875	0.175493	-0.323252	-0.128289	0.272981	0.0510237
PE 38:0	0.289749	0.247835	0.23295	-0.269255	0.0820932	-0.0517007	-0.43353	0.600428	0.528994	0.209094	-0.537736	-0.450783	0.542274	0.430815	-0.527562	-0.506879	-0.75677	0.688858	0.162507	0.0757365	-0.116866	0.710725	-0.140062	-0.452913	-0.428252	-0.479238	0.357131	0.202415	-0.213383	-0.370792	0.438932	-0.18383	-0.278466	-0.196916	-0.508533	-0.631358	-0.476081	-0.560802	0.65631	0.624533	-0.804497	0.512735	-0.815675	-0.523685	0.341249	-0.26511	-0.269116	0.116564	0.1271
SQDG 34:5	-0.0265251	-0.262512	-0.341462	-0.46677	-0.499673	-0.229292	-0.505208	-0.191759	0.0401794	0.303266	-0.276413	-0.408357	-0.326158	-0.459071	-0.386855	-0.411381	-0.383011	-0.123247	-0.502796	0.162474	-0.00559652	0.368887	-0.473922	-0.41126	-0.378692	-0.372817	-0.144705	0.16273	-0.599959	-0.141814	-0.327492	-0.453102	0.120819	-0.103701	-0.313961	-0.613591	-0.0977138	-0.535367	0.0475911	0.0532375	-0.417605	0.411899	-0.436631	-0.516243	0.239723	-0.0603448	-0.593492	-0.132604	-0.212948
SQDG 34:3	-0.377102	0.504109	-0.0870333	0.3676	0.120943	0.353356	0.241109	-0.0362808	0.470372	-0.188598	-0.040339	0.292886	0.42081	0.43078	0.587195	0.584353	0.144498	0.0435252	0.522298	0.54137	-0.590685	-0.219876	0.489123	0.368401	0.758306	0.330122	0.268674	0.306003	0.54542	0.532276	0.119979	0.596771	0.00215894	0.230115	0.525512	0.440883	0.637407	0.132074	-0.498586	-0.429943	0.257721	-0.149919	0.259439	0.240614	0.543876	0.497638	-0.0549667	-0.520801	0.436191
SQDG 36:5	-0.613949	0.200975	-0.233251	0.76969	0.225456	0.386465	0.514121	-0.558309	-0.0844707	-0.228816	-0.0360676	0.604406	0.134305	0.22618	0.632272	0.610684	0.537075	-0.407116	0.329887	0.358283	-0.277848	-0.506956	0.630591	0.719715	0.89845	0.597813	0.14796	0.351136	0.508246	0.632567	-0.100099	0.313469	-0.0960841	0.380755	0.680152	0.768028	0.836272	0.617255	-0.697234	-0.670619	0.72407	-0.192838	0.735945	0.674037	0.270043	0.617959	0.234917	-0.394399	0.0671738
SQDG 36:4	-0.640392	0.30151	-0.286121	0.741647	0.278066	0.519305	0.431453	-0.576973	0.15353	-0.1322	-0.17296	0.714393	0.156883	0.23874	0.649981	0.598952	0.489262	-0.251469	0.478334	0.344389	-0.293165	-0.404358	0.741685	0.759242	0.681254	0.638189	0.209059	0.330704	0.391835	0.707523	0.0158646	0.173252	-0.153445	0.199226	0.657376	0.720907	0.525184	0.579373	-0.549098	-0.533314	0.639534	-0.28409	0.624646	0.656492	0.252827	0.699643	0.321449	-0.150453	-0.194931
SQDG 36:3	-0.581862	0.372089	-0.351995	0.576941	0.16626	0.498905	0.454723	-0.508929	0.454168	-0.284705	0.088362	0.55004	0.0657669	0.120275	0.857825	0.818225	0.462165	-0.487649	0.436669	0.384805	-0.36607	-0.553295	0.557864	0.665843	0.78883	0.501252	-0.04837	0.246582	0.405687	0.716903	-0.333106	0.508423	0.115073	0.0410135	0.707335	0.671381	0.755895	0.458287	-0.70695	-0.693851	0.634517	-0.565619	0.659444	0.580033	0.264941	0.677151	0.189502	-0.257108	0.000653684
TAG 50:5 (1)	-0.385396	0.434763	-0.408326	0.626162	0.0849991	0.40475	0.150589	-0.56427	0.290993	0.0312099	-0.107237	0.655449	0.0034259	0.0806931	0.379439	0.379642	0.293459	0.195343	0.524939	0.480771	-0.293195	0.129347	0.740735	0.475717	0.691277	0.599523	0.719607	0.674847	0.169575	0.72833	0.407873	0.128534	0.100926	0.235661	0.659158	0.468163	0.510156	0.444259	-0.485125	-0.173347	0.54908	-0.150798	0.551282	0.667229	0.414127	0.658425	0.0944951	-0.0903928	0.423356
TAG 50:4 (1)	-0.495974	0.487393	-0.384859	0.753747	0.220978	0.622464	0.426169	-0.457227	0.269019	-0.0770048	-0.0392998	0.650619	0.213455	0.287331	0.623651	0.615147	0.328288	-0.0192325	0.58633	0.532372	-0.319703	-0.256769	0.818339	0.716906	0.829239	0.533584	0.412599	0.544957	0.542985	0.763535	0.311296	0.403039	0.134195	0.400607	0.808887	0.669335	0.758291	0.538362	-0.589977	-0.454039	0.631964	-0.273255	0.659239	0.736854	0.410626	0.686619	0.214814	-0.258833	0.386223
TAG 50:3	-0.593936	0.249114	-0.299809	0.743096	0.225739	0.601258	0.639157	-0.57024	-0.128982	-0.159604	0.199302	0.757598	0.0149296	0.12024	0.709445	0.677749	0.616015	-0.365154	0.356044	0.282611	-0.160259	-0.648126	0.711401	0.869343	0.774276	0.646256	0.0491889	0.24137	0.581932	0.709522	0.0154534	0.320568	0.05156	0.419045	0.852047	0.890397	0.712927	0.764899	-0.657756	-0.661118	0.862532	-0.462853	0.881371	0.833187	0.0495446	0.619317	0.393528	-0.173153	-0.0260826
TAG 50:2	-0.56883	0.292251	-0.252607	0.818721	0.311735	0.62057	0.605833	-0.504978	-0.0958292	-0.0319959	0.0715731	0.725427	0.145813	0.254916	0.605887	0.584174	0.492774	-0.257586	0.397574	0.288411	-0.143619	-0.555142	0.750705	0.841235	0.798774	0.561894	0.129306	0.280286	0.612334	0.654071	0.110313	0.304497	0.00968349	0.462886	0.799013	0.840162	0.745755	0.742409	-0.572215	-0.592294	0.775265	-0.28182	0.785279	0.797687	0.111246	0.56616	0.326934	-0.170551	0.0613475
TAG 52:7	-0.162856	0.151952	0.100907	-0.156123	0.0437402	0.212671	-0.150172	0.313452	0.19793	0.177694	-0.434202	-0.109081	0.431746	0.29524	-0.418953	-0.447355	-0.586924	0.333786	-0.144151	0.147708	-0.0507396	0.336845	-0.105368	-0.0382496	-0.406668	-0.302209	0.118952	0.130368	-0.132189	-0.151798	0.192652	-0.504417	-0.446761	0.0838542	-0.24347	-0.351553	-0.370332	-0.231175	0.551382	0.255028	-0.475613	0.344192	-0.50111	-0.287695	0.222722	-0.0164001	-0.0742116	0.219244	-0.496533
TAG 52:6	-0.556142	0.21791	-0.290485	0.697356	0.206007	0.552281	0.646457	-0.562423	-0.139738	-0.217936	0.265722	0.741442	-0.0460136	0.0570054	0.75942	0.731921	0.682204	-0.395823	0.347333	0.27164	-0.16534	-0.683299	0.672617	0.860438	0.7736	0.684343	0.00548285	0.181612	0.579346	0.7138	-0.0256941	0.371987	0.104426	0.404471	0.869588	0.907739	0.710375	0.767308	-0.702368	-0.688697	0.903627	-0.558197	0.925059	0.839641	0.00599688	0.61296	0.386045	-0.169433	-0.00593007
TAG 52:5 (1)	-0.413159	0.237139	-0.188456	0.756745	0.320015	0.585189	0.677019	-0.454106	-0.0770355	-0.137504	0.153518	0.675728	0.0694331	0.163534	0.736709	0.723825	0.595092	-0.343019	0.440469	0.23517	-0.0880234	-0.599705	0.736696	0.835779	0.767276	0.620503	0.044901	0.204102	0.624704	0.637241	0.0805827	0.439903	0.17662	0.352569	0.840183	0.866932	0.712191	0.759367	-0.597799	-0.571178	0.837318	-0.512788	0.866209	0.843797	0.00523287	0.51602	0.366414	-0.0994747	0.124154
TAG 52:4	0.24143	0.203283	0.236683	0.469332	0.446245	0.376539	0.297176	0.159751	0.210497	0.278718	-0.33173	0.05743	0.457959	0.46421	0.242945	0.28702	-0.0999023	0.102308	0.510971	0.0124988	0.119726	0.0294992	0.547856	0.253998	0.329785	0.0367538	0.167847	0.208867	0.402034	0.0286144	0.455893	0.410671	0.259745	0.00320524	0.273445	0.234616	0.316585	0.262949	0.0640857	0.136497	0.0948961	0.0022338	0.115551	0.309062	0.0387283	-0.086066	0.0876853	0.120174	0.446007
TAG 52:3	0.0278631	0.380931	0.118129	0.431649	0.504218	0.481074	0.155993	0.0929152	0.311847	0.515725	-0.434923	0.173837	0.529665	0.59532	0.0993776	0.136822	-0.308138	0.292993	0.489542	-0.0212365	0.126503	0.149675	0.556934	0.230138	0.238915	-0.0572343	0.287106	0.261204	0.28961	0.0423916	0.506159	0.207302	-0.0447603	0.0147566	0.132358	0.153505	0.147205	0.289801	0.160002	0.196908	-0.0184543	0.177073	-0.0483265	0.224127	0.0801888	-0.036463	0.0239139	0.179317	0.230409
TAG 52:2	-0.0353014	0.160325	0.208809	0.240821	0.365532	0.347754	0.622095	0.0426309	0.0467377	-0.182587	0.214724	0.161354	0.252962	0.326906	0.731937	0.738049	0.358037	-0.44022	0.353295	-0.170259	-0.0545313	-0.666231	0.308261	0.427177	0.449566	0.223933	-0.404028	-0.185844	0.591753	0.103436	-0.233196	0.776049	0.0669624	-0.122615	0.382929	0.605341	0.383087	0.474593	-0.373996	-0.3798	0.432473	-0.586762	0.454454	0.369728	-0.265738	-0.00879812	0.286125	-0.0937113	0.0762463
TAG 52:1	-0.0897717	-0.275358	-0.0588337	0.0437838	-0.163977	-0.116401	-0.251471	-0.185732	-0.0287004	0.586587	-0.534678	-0.0876168	-0.0621216	-0.151556	-0.170635	-0.177838	-0.195684	-0.207889	-0.276864	0.22534	0.102914	0.224386	-0.0552975	-0.127849	-0.0149655	-0.155842	-0.0209886	0.01126	-0.277503	0.029388	-0.091826	-0.442103	0.206937	0.103953	-0.0996006	-0.264413	0.153304	-0.238288	0.0610489	-0.012476	-0.184324	0.559332	-0.24894	-0.306588	0.285371	0.0649807	-0.41024	-0.0342369	-0.238378
TAG 54:9 (1)	-0.50936	0.206767	-0.297691	0.569481	0.10488	0.393712	0.562719	-0.510962	-0.11721	-0.305722	0.363552	0.654362	-0.109657	-0.0193021	0.813264	0.796872	0.757781	-0.391482	0.339596	0.329752	-0.295671	-0.712953	0.563536	0.759422	0.829839	0.730767	-0.036791	0.0990644	0.572878	0.716959	-0.0952667	0.50321	0.15821	0.407824	0.857224	0.884106	0.758797	0.657996	-0.829127	-0.763434	0.903878	-0.620828	0.919648	0.743735	0.0463026	0.615844	0.245199	-0.317689	0.110137
TAG 54:8	-0.171447	0.165029	-0.216288	0.538922	0.116423	0.222475	0.355257	-0.31891	-0.00185215	-0.23734	0.220599	0.404517	-0.0406899	0.0122573	0.696095	0.720992	0.657925	-0.187317	0.494969	0.292115	-0.296053	-0.456984	0.529177	0.522845	0.769321	0.670618	0.0801568	0.137698	0.465037	0.531992	0.102005	0.630053	0.282503	0.248963	0.700229	0.686163	0.705811	0.459332	-0.70785	-0.535664	0.699916	-0.484442	0.721511	0.599356	0.092098	0.417615	0.016818	-0.351134	0.425949
TAG 54:7 (2)	0.700599	-0.128424	0.271091	-0.22367	0.00416994	-0.379099	-0.415171	0.477376	0.207231	0.204077	-0.300609	-0.604397	0.164332	0.0781491	-0.288129	-0.210262	-0.323741	0.345568	0.169314	-0.147896	0.0606285	0.494892	-0.197812	-0.555201	-0.227525	-0.281367	0.0965959	-0.0263057	-0.229299	-0.485959	0.295987	0.208955	0.230661	-0.34586	-0.418834	-0.484167	-0.186804	-0.464999	0.327042	0.489883	-0.510661	0.311076	-0.508472	-0.425669	0.0307479	-0.505176	-0.44358	-0.0172269	0.525384
TAG 54:6 (2)	0.76302	-0.139779	0.395225	-0.372673	0.0771354	-0.390176	-0.501623	0.59277	0.233849	0.346859	-0.407749	-0.688033	0.231887	0.157897	-0.512455	-0.44043	-0.598055	0.44278	0.0441488	-0.326621	0.241341	0.655399	-0.306459	-0.697109	-0.514847	-0.533312	0.0868896	-0.0917892	-0.361612	-0.683239	0.315728	-0.0138241	0.0979856	-0.462425	-0.673277	-0.687705	-0.489097	-0.536876	0.63085	0.726526	-0.741407	0.456865	-0.756003	-0.58817	-0.0690669	-0.675567	-0.355907	0.212062	0.337254
TAG 54:5 (2)	0.694202	-0.0585058	0.354932	-0.329169	0.16253	-0.289627	-0.478754	0.545208	0.319123	0.416053	-0.4645	-0.612339	0.276181	0.220739	-0.521314	-0.454591	-0.690026	0.473049	0.0580123	-0.312258	0.278927	0.706319	-0.246791	-0.651804	-0.53713	-0.579202	0.146515	-0.0465059	-0.369349	-0.638757	0.321005	-0.0720488	0.0649596	-0.454829	-0.671873	-0.698103	-0.508498	-0.479957	0.6775	0.758964	-0.749871	0.470687	-0.769013	-0.549591	-0.0376414	-0.627419	-0.325533	0.306024	0.293952
TAG 54:4	0.605421	0.00747061	0.290321	-0.298088	0.155294	-0.215697	-0.47945	0.50017	0.362641	0.467626	-0.49484	-0.539035	0.304906	0.246531	-0.537658	-0.476265	-0.734238	0.497415	0.052717	-0.253719	0.250623	0.745078	-0.21738	-0.619716	-0.520695	-0.570079	0.215163	0.0217008	-0.385982	-0.582438	0.326922	-0.131576	0.00637394	-0.436944	-0.650221	-0.700639	-0.495963	-0.45811	0.686038	0.750821	-0.748953	0.508513	-0.775516	-0.531846	0.0311238	-0.562316	-0.358535	0.310656	0.258016
TAG 54:3	0.0462737	0.249731	0.143757	0.13579	0.263819	0.214861	-0.0448931	0.187632	0.141649	0.665326	-0.454374	-0.00353062	0.424604	0.420559	-0.307091	-0.270611	-0.440989	0.330258	0.114061	-0.0372686	0.103559	0.365796	0.139986	-0.0808274	0.0315883	-0.185253	0.282767	0.194284	-0.0171795	-0.175192	0.295092	-0.119375	-0.251146	-6.59227e-05	-0.154461	-0.159877	-0.0233467	0.0481919	0.327325	0.317235	-0.245029	0.461305	-0.304055	-0.084354	0.119082	-0.187641	-0.370036	0.172279	0.0780159
TAG 54:2	-0.218812	0.366074	-0.0622443	0.226044	0.149146	0.366303	0.107673	0.00723195	0.0498535	0.561392	-0.191634	0.177519	0.372921	0.424553	-0.112631	-0.0943953	-0.241598	0.211497	0.146182	0.0494609	-0.0652907	0.0635355	0.229442	0.105931	0.27957	-0.0647112	0.216001	0.276495	0.172963	0.0203207	0.214981	0.0437943	-0.315069	0.165323	0.0729335	0.101941	0.215931	0.198288	0.0234132	0.0456327	-0.0171145	0.351535	-0.0615995	0.0811557	0.148424	-0.00426352	-0.238441	-0.0785524	0.0916416
TAG 54:1	-0.159796	-0.294644	-0.161664	0.222107	-0.0935913	-0.144964	-0.283093	-0.32133	-0.148596	0.423784	-0.495913	0.00721204	-0.0845685	-0.150843	-0.109885	-0.104459	-0.0470625	-0.224528	-0.194615	0.213385	0.0563597	0.133723	0.0460467	-0.0241573	0.103294	0.0547675	0.0251881	0.0591149	-0.272842	0.0807087	-0.0721744	-0.395997	0.0870472	0.136022	-0.0549246	-0.132179	0.265833	-0.102398	-0.0685188	-0.16286	-0.0395906	0.517267	-0.106315	-0.17614	0.26929	0.137109	-0.441449	-0.173604	-0.249501
TAG 56:9 (1/2)	-0.477261	0.228883	-0.200668	0.60333	0.176258	0.47116	0.642244	-0.4579	-0.136759	-0.286457	0.351393	0.663167	-0.0264698	0.0738618	0.818559	0.797823	0.729608	-0.387646	0.387832	0.248789	-0.245795	-0.747359	0.635812	0.793754	0.813194	0.704872	-0.0530519	0.109312	0.637475	0.670097	-0.0324671	0.522598	0.127461	0.373005	0.861754	0.928087	0.71353	0.709634	-0.753857	-0.699668	0.890739	-0.627584	0.913293	0.778216	-0.0204743	0.558187	0.365979	-0.258731	0.073339
TAG 56:8	0.101855	0.13262	0.113037	0.441937	0.271193	0.285035	0.458142	-0.0704269	-0.0611106	-0.00603509	0.165929	0.242333	0.145935	0.201699	0.651953	0.68999	0.488419	-0.19612	0.527905	-0.0205055	-0.10027	-0.492014	0.551008	0.425518	0.620547	0.473409	-0.096704	0.0120713	0.533441	0.230074	0.194212	0.732506	0.302989	0.0586232	0.572704	0.657047	0.536492	0.491202	-0.456392	-0.284934	0.555569	-0.461937	0.574951	0.512052	-0.17599	0.0676132	0.137502	-0.147203	0.369776
TAG 56:7 (2)	0.601293	-0.0264663	0.537718	0.114226	0.423879	-0.178146	0.0317202	0.482074	0.134086	0.0533204	-0.06357	-0.123763	0.248724	0.272768	-0.0993097	-0.035207	-0.0418752	0.343602	0.31171	-0.324973	0.219528	0.255931	0.0692823	-0.192399	-0.12458	-0.0509237	0.192083	-0.301007	0.0829157	-0.323381	0.329896	0.218124	0.142331	-0.261316	-0.198303	-0.0502853	-0.270871	0.0350494	0.431336	0.485209	-0.147721	-0.00869751	-0.147617	0.000905216	-0.247416	-0.404834	0.106104	0.424648	0.400752
TAG 56:6	0.717902	-0.081829	0.36903	-0.170581	0.0758033	-0.303529	-0.384686	0.376969	0.235491	0.491436	-0.330989	-0.429676	0.153829	0.142913	-0.216527	-0.136209	-0.37013	0.352675	0.218915	-0.261461	0.212612	0.528121	0.000848234	-0.548256	-0.175898	-0.308731	0.197684	-0.0315872	-0.213543	-0.434128	0.439138	0.16196	0.343885	-0.41268	-0.374872	-0.397819	-0.238068	-0.320954	0.365747	0.63028	-0.439244	0.351847	-0.469428	-0.360426	-0.0638407	-0.518047	-0.208499	0.177306	0.5282
TAG 56:5	0.661504	-0.0531728	0.247108	-0.289114	-0.0229448	-0.365515	-0.513425	0.38211	0.357828	0.413464	-0.367526	-0.508845	0.129181	0.0844843	-0.319654	-0.246232	-0.503142	0.380579	0.112057	-0.147035	0.145212	0.670191	-0.162987	-0.658653	-0.266783	-0.410523	0.24546	0.0260642	-0.33709	-0.434555	0.319082	0.0762683	0.290127	-0.447274	-0.492647	-0.588888	-0.274241	-0.492872	0.3937	0.620228	-0.578987	0.427097	-0.607239	-0.497562	0.101133	-0.471085	-0.372285	0.101875	0.55127
TAG 56:3	-0.415861	0.533514	-0.366135	0.469265	0.0988983	0.601749	0.121711	-0.155946	0.364132	0.224899	-0.31358	0.266997	0.484102	0.511024	0.132202	0.140356	-0.243021	0.236049	0.409292	0.377838	-0.272598	0.119046	0.471723	0.335608	0.47936	0.0359406	0.439276	0.706188	0.278796	0.315483	0.361387	0.18962	-0.283685	0.18947	0.302213	0.187154	0.453817	0.202212	-0.167152	-0.116287	0.0483166	0.265356	0.0559933	0.284239	0.493881	0.326438	-0.0595286	-0.312705	0.29972
Height	0.656152	-0.408928	0.366967	-0.653019	-0.277051	-0.644521	-0.596402	0.49168	-0.0411532	0.416822	-0.308242	-0.748052	-0.0754313	-0.185846	-0.764853	-0.725246	-0.616735	0.242871	-0.479738	-0.275137	0.324611	0.669641	-0.669809	-0.867281	-0.689998	-0.711251	-0.0577383	-0.239322	-0.565012	-0.721184	0.0373379	-0.434617	0.167576	-0.30318	-0.79014	-0.880027	-0.563444	-0.726952	0.658172	0.694548	-0.794423	0.64896	-0.821254	-0.80012	-0.0685259	-0.66882	-0.339449	0.247873	0.101589
Pedunclelength	0.491615	-0.276044	0.335237	-0.514102	0.138493	-0.372732	-0.284361	0.13865	-0.151272	0.502721	-0.226207	-0.306929	-0.272318	-0.197645	-0.420165	-0.390647	-0.229701	0.147779	-0.231541	-0.66608	0.622416	0.374072	-0.317945	-0.463632	-0.656347	-0.304333	-0.142281	-0.354305	-0.529261	-0.541342	0.0546865	-0.392171	-0.0413104	-0.433644	-0.601204	-0.44357	-0.800297	-0.0673522	0.462521	0.620495	-0.286821	0.0265108	-0.361184	-0.289783	-0.621812	-0.555517	0.0558884	0.754733	-0.344241
Lastinternodelength	0.592976	-0.259088	0.519105	-0.453513	0.217861	-0.384534	-0.340957	0.650624	-0.173331	0.191802	-0.24707	-0.671049	0.192969	0.194845	-0.709756	-0.666824	-0.386707	0.305708	-0.10466	-0.698624	0.438738	0.264256	-0.466052	-0.550469	-0.761848	-0.490703	-0.32314	-0.448545	-0.289408	-0.859359	0.159422	-0.234259	-0.353147	-0.460005	-0.842306	-0.585217	-0.82109	-0.383887	0.721652	0.590527	-0.692419	0.323621	-0.730623	-0.589034	-0.511383	-0.7883	-0.052116	0.333256	-0.290695
Earlength	-0.00567651	-0.0404822	-0.160297	-0.123477	-0.333744	0.158845	-0.060141	0.0756333	0.037096	-0.101173	0.181577	-0.255172	0.0763924	0.0651197	0.0813816	0.0784698	-0.0817895	-0.17324	0.0216311	-0.172606	-0.117282	-0.123358	-0.167389	-0.163693	-0.0948607	-0.22362	-0.206097	0.213438	-0.0866743	-0.226548	-0.108498	0.223531	-0.187582	-0.380777	-0.161337	-0.0722176	-0.042169	-0.173724	0.0310268	0.0231979	-0.280577	0.146434	-0.229002	-0.232917	0.000733197	-0.202254	0.0543274	-0.426869	-0.0587211
Awnlength	0.0474386	-0.0854827	0.334494	-0.11702	0.235117	0.108703	0.146478	0.215539	-0.337228	0.2808	-0.0592618	-0.00552869	0.0203351	0.114793	-0.109355	-0.123998	0.0857396	0.11263	0.0256178	-0.501031	0.379443	-0.242145	0.0457129	0.134487	-0.317875	-0.0257728	-0.333389	-0.331312	0.0865135	-0.243233	0.246681	-0.198056	-0.298056	0.042242	-0.133365	0.145536	-0.553263	0.21986	0.284093	0.172231	-0.00403154	-0.128548	-0.0534623	0.021314	-0.614757	-0.268708	0.338309	0.380474	-0.632723
EarN	0.636961	-0.327309	0.387483	-0.556118	-0.0430132	-0.45385	-0.50213	0.605167	0.0670205	0.229825	-0.372201	-0.791561	0.151281	0.0332136	-0.793429	-0.751497	-0.663859	0.173317	-0.336818	-0.409732	0.355078	0.593569	-0.638398	-0.746593	-0.797651	-0.716561	-0.21308	-0.23638	-0.506751	-0.81696	-0.054621	-0.3625	-0.0635056	-0.532361	-0.870606	-0.886401	-0.63847	-0.660284	0.765132	0.64571	-0.870337	0.549448	-0.877885	-0.762081	-0.139538	-0.736468	-0.33471	0.227051	-0.0596303
GrainNtotal	0.681667	-0.441267	0.390193	-0.591241	-0.155307	-0.480338	-0.540459	0.566213	-0.00200534	0.247643	-0.273752	-0.783684	0.0755255	-0.054625	-0.808072	-0.766225	-0.690695	0.0984623	-0.53012	-0.457584	0.329311	0.637051	-0.701782	-0.799713	-0.842551	-0.740324	-0.246922	-0.245812	-0.622848	-0.84998	-0.233484	-0.496763	-0.0515198	-0.644418	-0.866677	-0.899965	-0.666839	-0.642791	0.785599	0.742842	-0.891722	0.628142	-0.896569	-0.787185	-0.172933	-0.788702	-0.290906	0.233907	-0.141678
Totalplantbiomass	0.704057	-0.338498	0.383804	-0.598394	-0.144325	-0.432254	-0.564155	0.603169	0.124245	0.265705	-0.313442	-0.789349	0.12297	-0.0222758	-0.795072	-0.75134	-0.707671	0.216052	-0.371869	-0.42043	0.281072	0.66109	-0.654156	-0.804546	-0.829712	-0.724048	-0.165171	-0.190283	-0.622398	-0.831118	-0.0851616	-0.409707	-0.0216856	-0.648462	-0.841799	-0.899726	-0.657634	-0.671098	0.795413	0.741011	-0.901103	0.564173	-0.905068	-0.780083	-0.139984	-0.775661	-0.312802	0.272877	-0.053495
GWtotal	0.709864	-0.318448	0.401869	-0.599193	-0.136774	-0.41696	-0.550737	0.61936	0.140898	0.266332	-0.297755	-0.779648	0.1483	-0.00554514	-0.7894	-0.744123	-0.726365	0.236977	-0.369066	-0.397617	0.254799	0.667806	-0.641809	-0.799583	-0.816274	-0.72373	-0.145752	-0.186569	-0.604427	-0.8216	-0.073877	-0.388545	-0.00380051	-0.629415	-0.813675	-0.89054	-0.635788	-0.661882	0.802503	0.748819	-0.895664	0.55374	-0.897735	-0.770715	-0.126744	-0.771313	-0.311652	0.289068	-0.0248566
Strawbiomass	0.660636	-0.306671	0.483524	-0.677914	-0.0653968	-0.39064	-0.475686	0.762657	0.0316291	0.270443	-0.268189	-0.801816	0.152746	0.0245998	-0.848066	-0.824088	-0.713482	0.203007	-0.473075	-0.449343	0.365157	0.580166	-0.728865	-0.77441	-0.881851	-0.801537	-0.376196	-0.382939	-0.564449	-0.856321	-0.143299	-0.442122	-0.0772005	-0.60605	-0.861338	-0.90037	-0.713135	-0.662353	0.823279	0.693725	-0.901686	0.505767	-0.909611	-0.788288	-0.24016	-0.800711	-0.276775	0.331654	-0.185411
Harvestindex	0.551137	-0.0629483	0.427224	-0.438167	-0.0340347	-0.166244	-0.268188	0.58459	0.315783	0.191477	-0.115819	-0.532655	0.345123	0.156987	-0.422529	-0.385983	-0.701619	0.338469	-0.188486	-0.0526842	-0.093524	0.526742	-0.360119	-0.539315	-0.464715	-0.586448	0.0646137	-0.0946816	-0.245859	-0.512559	0.0501043	-0.0386624	0.190901	-0.247056	-0.336434	-0.55573	-0.250754	-0.434738	0.639295	0.608828	-0.64052	0.323596	-0.615808	-0.501913	0.0649632	-0.50857	-0.184902	0.357364	0.251102
MESpikletnumber	0.0985788	-0.186847	-0.0661155	-0.203195	-0.500064	-0.258569	-0.421431	0.193553	0.0617079	-0.128346	-0.00935435	-0.431563	0.0982921	-0.0554174	-0.2682	-0.248735	-0.327134	0.0127087	-0.244588	0.228938	-0.306273	0.283286	-0.36907	-0.456008	-0.0677052	-0.310333	0.0933849	0.21573	-0.256253	-0.23015	-0.0734134	-0.0532259	0.0148413	-0.113067	-0.26709	-0.420886	0.146677	-0.559621	0.142238	0.0705731	-0.498216	0.578305	-0.463849	-0.52791	0.437886	-0.143187	-0.345548	-0.548501	0.262016
MESpikletwithseeds	0.0290996	-0.236498	-0.172534	-0.156368	-0.513212	-0.155727	-0.405403	0.13343	-0.0998824	-0.212373	0.101819	-0.436221	0.0621226	-0.0869538	-0.271699	-0.269415	-0.163078	0.0284908	-0.172545	0.0834395	-0.388269	0.0772352	-0.355327	-0.336908	-0.157809	-0.193072	-0.0789514	0.203143	-0.282539	-0.285782	-0.0837566	-0.0388832	-0.194368	-0.122963	-0.226331	-0.290262	0.063076	-0.469188	0.106608	-0.00893486	-0.4528	0.495973	-0.405275	-0.456713	0.245381	-0.181612	-0.313707	-0.595967	-0.0187361
MESeedsperspikelet	-0.0963269	-0.178768	-0.313136	-0.194271	-0.300045	0.1493	-0.00190675	-0.177884	-0.234756	-0.117021	0.388441	0.0155541	-0.329435	-0.341883	-0.0501937	-0.0884421	0.148959	-0.193964	-0.236529	-0.293277	0.0724219	-0.226262	-0.275799	0.0290303	-0.391509	-0.0126152	-0.342103	-0.0663688	-0.269281	-0.126934	-0.282429	-0.155157	-0.189544	-0.272388	-0.0583936	0.00271553	-0.305214	0.0633895	0.0499537	-0.0623268	0.0177663	-0.202307	0.0422284	0.0057537	-0.363247	-0.120862	0.104607	0.0714046	-0.488124
MEGrainN	-0.0323287	-0.283619	-0.322101	-0.291265	-0.559616	-0.0130899	-0.228452	-0.0782111	-0.197554	-0.169831	0.354969	-0.213525	-0.271707	-0.366509	-0.18587	-0.212102	-0.0226357	-0.19217	-0.359904	-0.150575	-0.093998	-0.0589412	-0.451115	-0.223299	-0.397795	-0.168752	-0.269051	0.0535716	-0.401214	-0.236933	-0.309031	-0.185045	-0.151034	-0.318244	-0.19295	-0.220531	-0.203253	-0.240856	0.115987	-0.0149075	-0.242097	0.122778	-0.201035	-0.277559	-0.105892	-0.185131	-0.0805489	-0.222291	-0.32404
MEtotalweight	0.281122	-0.238103	0.111175	-0.263078	-0.377584	-0.0335227	-0.178903	0.28301	-0.0310862	-0.208865	0.156622	-0.424037	0.139893	-0.0414811	-0.206386	-0.206542	-0.27442	-0.0641309	-0.193723	-0.137761	-0.186248	0.118023	-0.332959	-0.343723	-0.344828	-0.282332	-0.135433	0.12831	-0.262414	-0.430621	-0.111954	0.0120296	-0.0612508	-0.427693	-0.222231	-0.289358	-0.143807	-0.338775	0.36267	0.247155	-0.450121	0.234726	-0.382647	-0.365592	-0.000432611	-0.388019	-0.0325668	-0.163485	-0.0426126
MEGW(g)	0.383724	-0.227194	0.182008	-0.370551	-0.349614	-0.0705588	-0.215335	0.396143	0.0258056	-0.177201	0.16031	-0.49499	0.166989	-0.0442841	-0.262894	-0.253406	-0.384297	0.00534421	-0.233934	-0.131699	-0.169605	0.197954	-0.398841	-0.421005	-0.440276	-0.356355	-0.139822	0.0555479	-0.29099	-0.491439	-0.10039	0.00730288	0.00803822	-0.430498	-0.268122	-0.385824	-0.205925	-0.39813	0.460667	0.331467	-0.525666	0.206569	-0.459507	-0.436197	-0.0103871	-0.45507	-0.103878	-0.062578	-0.0043819
ME_HI	0.643054	-0.244685	0.346205	-0.583987	-0.245991	-0.318504	-0.40003	0.617805	0.141365	0.0527946	0.0407768	-0.667672	0.122535	-0.111171	-0.484779	-0.443421	-0.60592	0.254412	-0.331967	-0.0632273	-0.0349731	0.485052	-0.54786	-0.654148	-0.604091	-0.546601	-0.0718637	-0.18639	-0.370402	-0.578358	0.00500757	-0.0934784	0.290348	-0.271559	-0.418483	-0.671696	-0.324255	-0.602123	0.633316	0.538018	-0.690809	0.279406	-0.653485	-0.633852	0.0192513	-0.567361	-0.370624	0.185084	0.212256
METKW(g)	0.571711	0.00361937	0.638263	-0.123683	0.18423	-0.118538	-0.0503759	0.619445	0.257263	-0.00912988	-0.248833	-0.434326	0.541691	0.375171	-0.16105	-0.114998	-0.484567	0.252606	0.124136	0.0105293	-0.111636	0.367009	0.0106732	-0.324836	-0.0944496	-0.288117	0.161042	0.0280972	0.078607	-0.384285	0.266344	0.215248	0.213552	-0.181225	-0.143933	-0.271484	-0.0141382	-0.279786	0.477281	0.479686	-0.437129	0.206537	-0.397897	-0.273921	0.13813	-0.397042	-0.0532882	0.150735	0.424486
ME�area	0.563746	0.047424	0.508162	-0.0184342	0.175304	-0.0969802	-0.0912896	0.538784	0.291943	-0.0474228	-0.233977	-0.399625	0.542065	0.389035	-0.117163	-0.0652599	-0.406395	0.295878	0.25727	0.0266525	-0.201035	0.367975	0.0872927	-0.305494	-0.0253543	-0.193088	0.233269	0.129301	0.0557136	-0.345808	0.312175	0.30247	0.175882	-0.231065	-0.111883	-0.222503	0.0462614	-0.251569	0.394733	0.461444	-0.399462	0.206719	-0.352568	-0.209195	0.178976	-0.353211	-0.0890219	0.0561716	0.501286
ME�width	0.593933	-0.0255204	0.59954	-0.186635	0.0750338	-0.166228	-0.094776	0.634797	0.237517	-0.0781648	-0.141014	-0.446663	0.499005	0.315883	-0.188779	-0.145502	-0.471503	0.244428	0.0701397	0.00356293	-0.15376	0.365354	-0.0722408	-0.390944	-0.155771	-0.300256	0.151877	0.00450015	0.0266669	-0.415458	0.229494	0.20041	0.207022	-0.243336	-0.182016	-0.308982	-0.0609087	-0.338519	0.502137	0.496016	-0.46947	0.205539	-0.424024	-0.323804	0.136905	-0.417812	-0.0282595	0.120561	0.422498
ME�length	0.277589	0.323721	0.0729898	0.378909	0.335781	0.200599	-0.0528148	0.200902	0.429252	0.0388609	-0.352045	-0.14606	0.559415	0.511156	0.0477104	0.104694	-0.218003	0.461212	0.655926	0.148724	-0.330073	0.320846	0.43854	0.0122992	0.284629	0.0723866	0.43885	0.470715	0.143624	-0.0474005	0.488529	0.467926	-0.00182748	-0.0827296	0.127921	0.031572	0.288083	0.0206368	0.05966	0.268851	-0.15116	0.158754	-0.106512	0.146265	0.294457	-0.0634123	-0.201098	-0.103864	0.608827
[truncated: 125 more columns]
